# Supplementary material for: Effect of (H2O)n (n = 0–3, 13) on the NH3 + OH reaction in the gas and liquid phases
Source: Royal Society of Chemistry journal article supplement (doi:10.1039/d2ra04931g), 2022-01-01
Supplement: d2ra04931g1.pdf [file d2ra04931g1.pdf]

# Supporting information

-for-

## **Effect Of $(\text{H}_2\text{O})_n$ ( $n=0-3,13$ ) On The $\text{NH}_3 + \text{OH}$ Reaction in the gas and liquid phases**

Yujie Zhou<sup>a</sup>, Qi Cao<sup>b</sup>, Yu Yang<sup>b</sup>, Dandan Ma<sup>a</sup>, Quan Zhu<sup>c,d</sup> and Jianyi Ma<sup>a,d\*</sup>

<sup>a</sup> Institute of Atomic and Molecular Physics, Sichuan University, Chengdu, 610065, China

<sup>b</sup> Reactor Operation and Application Research Sub-Institute, Nuclear Power Institute of China, Chengdu 610041, China

<sup>c</sup> School of Chemical Engineering, Sichuan University, Chengdu, 610065, PR China

<sup>d</sup> Engineering Research Center of Combustion and Cooling for Aerospace Power, Ministry of Education, Sichuan University, Chengdu, 610065, PR China

**Table S1** Relative free energy ( $\text{kcal}\cdot\text{mol}^{-1}$ ) relative to reactants for  $\text{NH}_3+\text{OH}\rightarrow\text{NH}_2+\text{H}_2\text{O}$  reaction.

|                     | $\Delta G_{IM}$ | $\Delta G_{TS}$ |
|---------------------|-----------------|-----------------|
| DFT( <i>s</i> )     | 6.0             | 9.3             |
| DFT( <i>g</i> )     | 4.0             | 8.5             |
| CCSD(T)( <i>g</i> ) | 5.6             | 6.9             |

$\Delta G_{IM}$  is the energy of the IM relative to the reactants and  $\Delta G_{TS}$  is the energy of the TS relative to the reactants. *s* and *g* represent the calculation result in the liquid and gas phases.

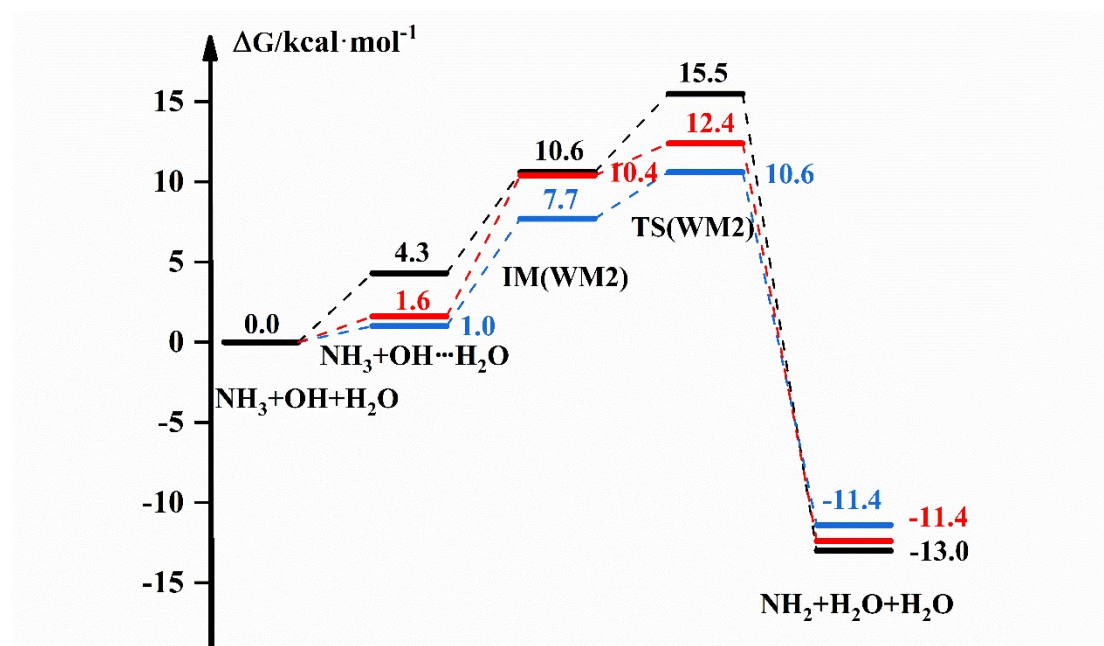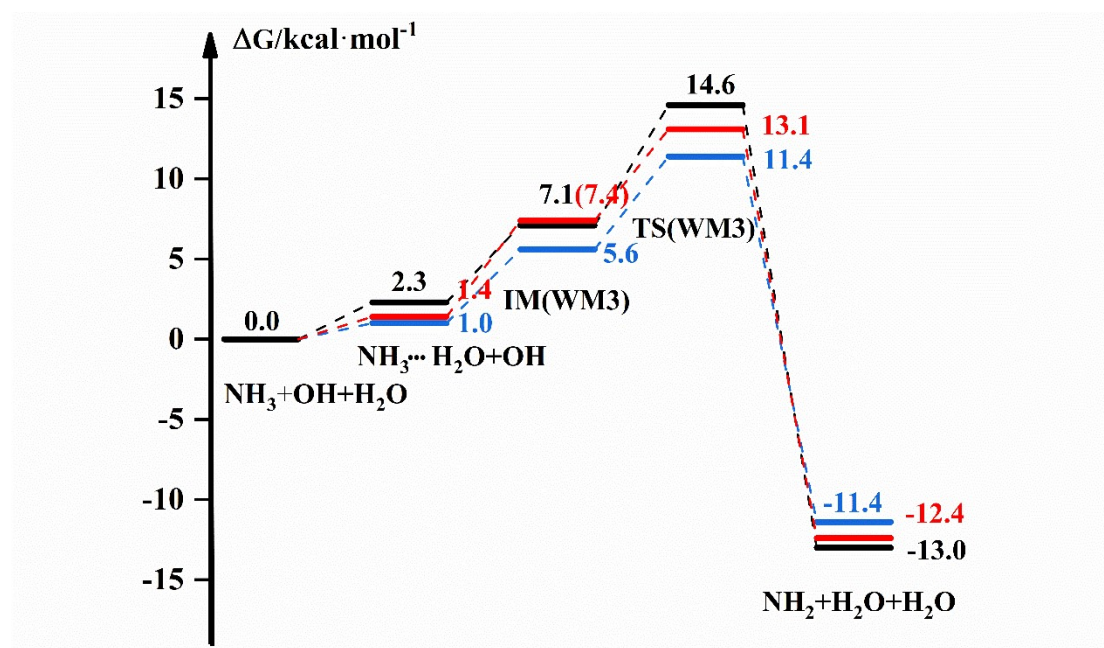

**Fig. S1** The free energy diagram for the  $\text{NH}_3+\text{OH}+\text{H}_2\text{O}$  reaction at the M06-2X/6-311+G(2d,2p) level (blue line) and the CCSD(T)-F12a/cc-pVDZ-F12//M06-2X/6-311+G(2d,2p) level (red line) in the gas phase and at the M06-2X/6-311+G(2d,2p) level in the liquid phase (black line).

**Table S2** Relative free energy ( $\text{kcal}\cdot\text{mol}^{-1}$ ) relative to reactants for  $\text{NH}_3+\text{OH}+\text{H}_2\text{O}\rightarrow\text{NH}_2+\text{H}_2\text{O}+\text{H}_2\text{O}$  reaction.

|     |                     | $\Delta G_1$ | $\Delta G_2$ | $\Delta G_3$ |
|-----|---------------------|--------------|--------------|--------------|
| WM1 | DFT( <i>s</i> )     | 3.0          | 8.7          | 14.2         |
|     | DFT( <i>g</i> )     | 1.0          | 7.6          | 10.7         |
|     | CCSD(T)( <i>g</i> ) | 1.6          | 10.3         | 12.4         |
| WM2 | DFT( <i>s</i> )     | 4.3          | 10.6         | 15.5         |
|     | DFT( <i>g</i> )     | 1.0          | 7.7          | 10.6         |
|     | CCSD(T)( <i>g</i> ) | 1.6          | 10.4         | 12.4         |
| WM3 | DFT( <i>s</i> )     | 2.3          | 7.1          | 14.6         |
|     | DFT( <i>g</i> )     | 1.0          | 5.6          | 11.4         |
|     | CCSD(T)( <i>g</i> ) | 1.4          | 7.4          | 13.1         |

$\Delta G_1$  is the energy of the bimolecular complex relative to the reactants and  $\Delta G_2$  is the energy of the IM relative to the reactants.  $\Delta G_3$  is the energy of TS relative to the reactants.

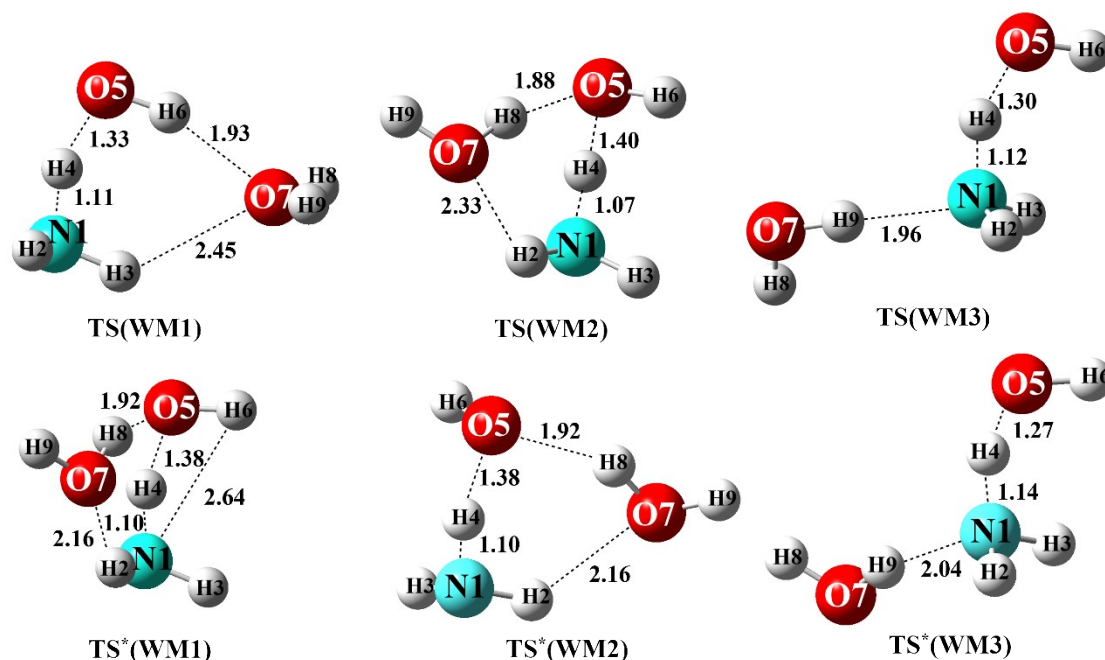

**Fig. S2** The transition state structure of  $\text{NH}_3+\text{OH}+\text{H}_2\text{O}$  reaction at the M06-2X/6-311+G(2d,2p) level in the gas and liquid phases (bond length Å). The ‘\*’ indicates the transition state structure in the gas phase.

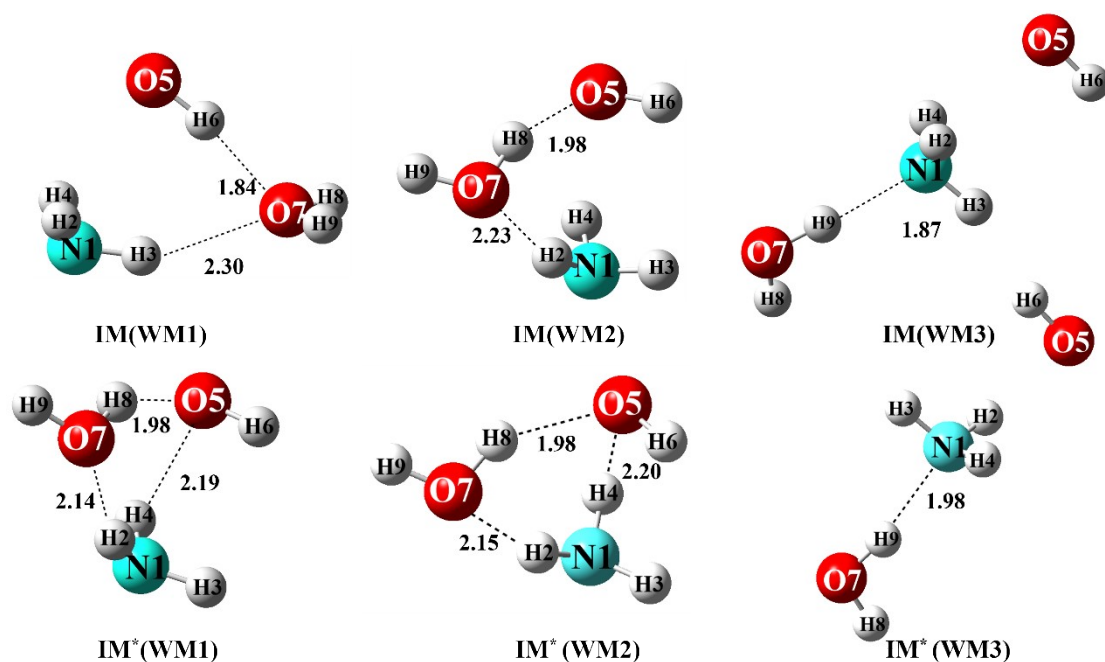

**Fig. S3** The precursor complexes structure of  $\text{NH}_3 + \text{OH} + \text{H}_2\text{O}$  reaction at the M06-2X/6-311+G(2d,2p) level in the gas and liquid phases (bond length Å). The '\*' indicates the structure in the gas phase.

**Table S3** Hydrogen bonding bond energy  $E_{\text{HB}}$  ( $\text{kcal}\cdot\text{mol}^{-1}$ ) in the precursor complex of the  $\text{NH}_3 + \text{OH} + \text{H}_2\text{O}$  reaction.

|     | liquid |                 | gas   |                 |
|-----|--------|-----------------|-------|-----------------|
|     |        | $E_{\text{HB}}$ |       | $E_{\text{HB}}$ |
| WM1 | H6-O7  | -4.37           | H2-O7 | -2.45           |
|     | H3-O7  | -1.80           | H4-O5 | -4.89           |
|     |        |                 | H8-O5 | -3.49           |
| WM2 |        |                 | H2-O7 | -2.46           |
|     | H8-O5  | -3.38           | H4-O5 | -4.86           |
|     | H2-O7  | -2.07           | H8-O5 | -3.48           |
| WM3 | H9-N1  | -4.73           | H9-N1 | -4.01           |

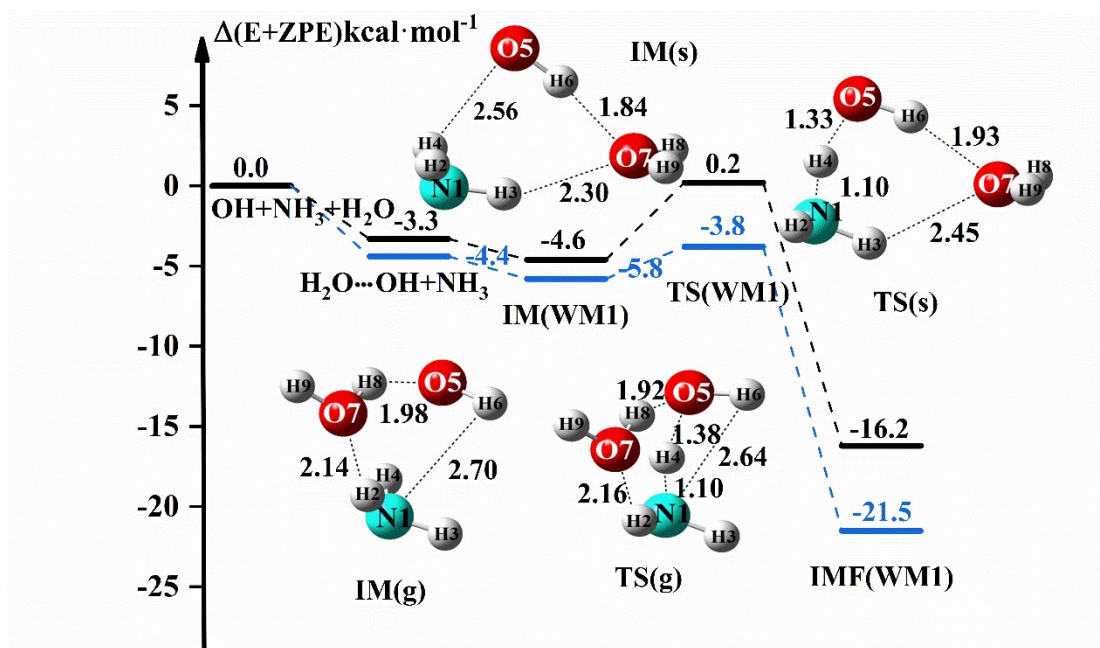

**Fig. S4** Schematic energy diagram and optimized structures for WM1 at the M06-2X/6-311+G(2d,2p) level in the liquid (black line) and gas phases (blue line), *s* and *g* represent the calculation result in the liquid and gas phases (bond length Å).

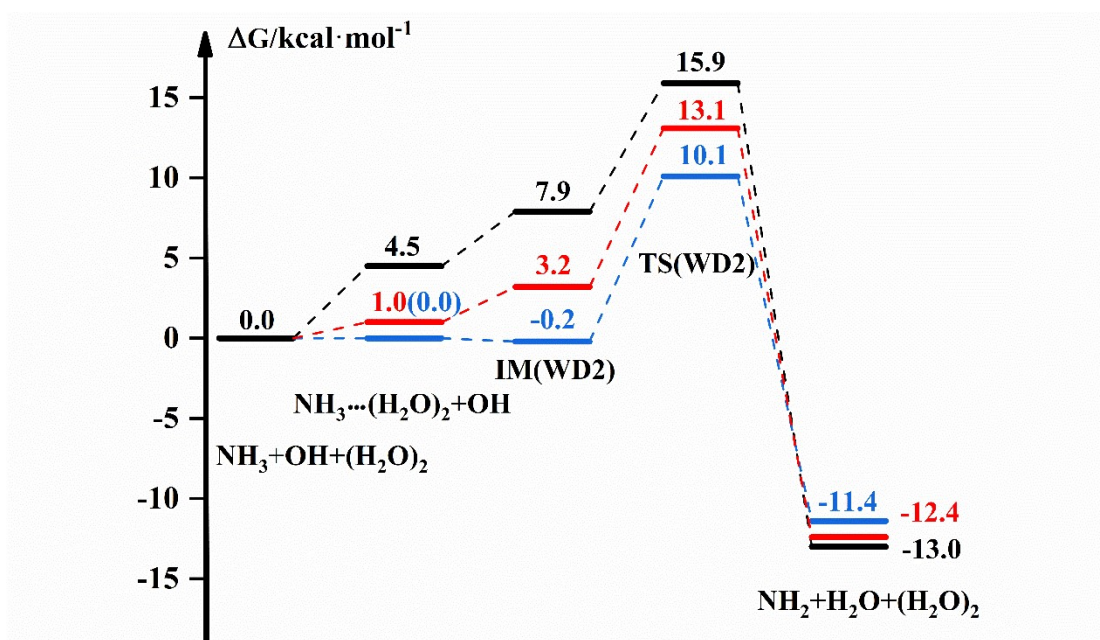

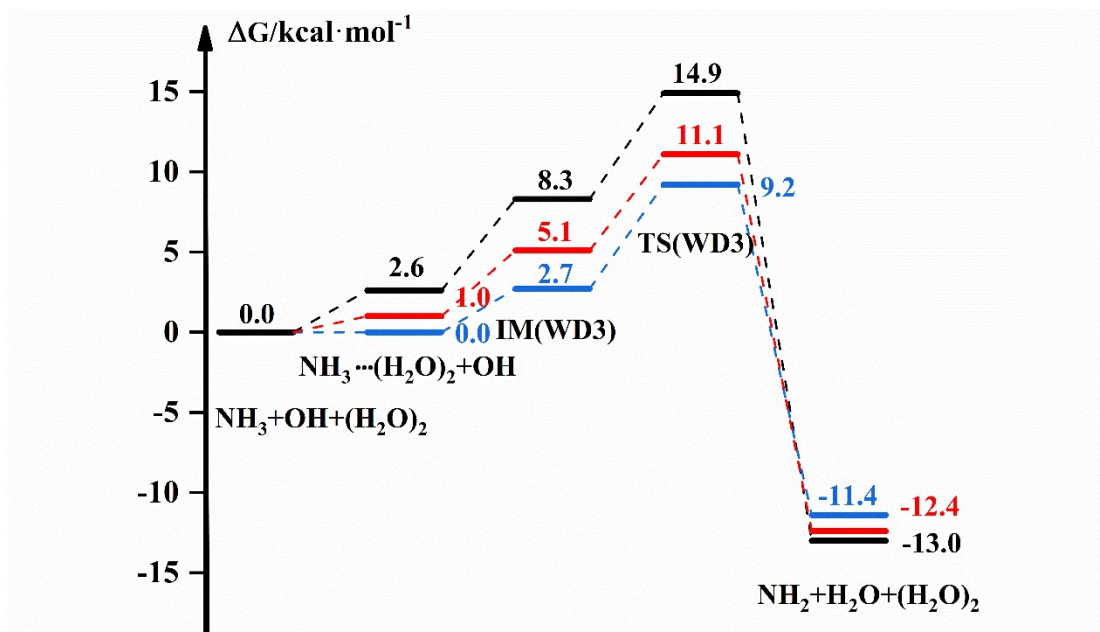

**Fig. S5** The free energy diagram for the  $\text{NH}_3+\text{OH}+(\text{H}_2\text{O})_2$  reaction at the M06-2X/6-311+G(2d,2p) level (blue line) and the CCSD(T)-F12a/cc-pVDZ-F12//M06-2X/6-311+G(2d,2p) level (red line) in the gas phase and at the M06-2X/6-311+G(2d,2p) level in the liquid phase (black line).

**Table S4** Relative free energy ( $\text{kcal}\cdot\text{mol}^{-1}$ ) relative to reactants for  $\text{NH}_3+\text{OH}+(\text{H}_2\text{O})_2\rightarrow\text{NH}_2+\text{H}_2\text{O}+(\text{H}_2\text{O})_2$  reaction.

|     |                     | $\Delta G_1$ | $\Delta G_2$ | $\Delta G_3$ |
|-----|---------------------|--------------|--------------|--------------|
| WD1 | DFT( <i>s</i> )     | 3.5          | 9.7          | 14.6         |
|     | DFT( <i>g</i> )     | -0.6         | 1.5          | 9.4          |
|     | CCSD(T)( <i>g</i> ) | 0.9          | 5.1          | 12.6         |
| WD2 | DFT( <i>s</i> )     | 4.5          | 7.9          | 15.9         |
|     | DFT( <i>g</i> )     | 0.0          | -0.2         | 10.1         |
|     | CCSD(T)( <i>g</i> ) | 1.0          | 3.2          | 13.1         |
| WD3 | DFT( <i>s</i> )     | 2.6          | 8.3          | 14.9         |
|     | DFT( <i>g</i> )     | 0.0          | 2.7          | 9.2          |
|     | CCSD(T)( <i>g</i> ) | 1.0          | 5.1          | 11.1         |

$\Delta G_1$  is the energy of the bimolecular complex relative to the reactants and  $\Delta G_2$  is the energy of the IM relative to the reactants.  $\Delta G_3$  is the energy of TS relative to the reactants.

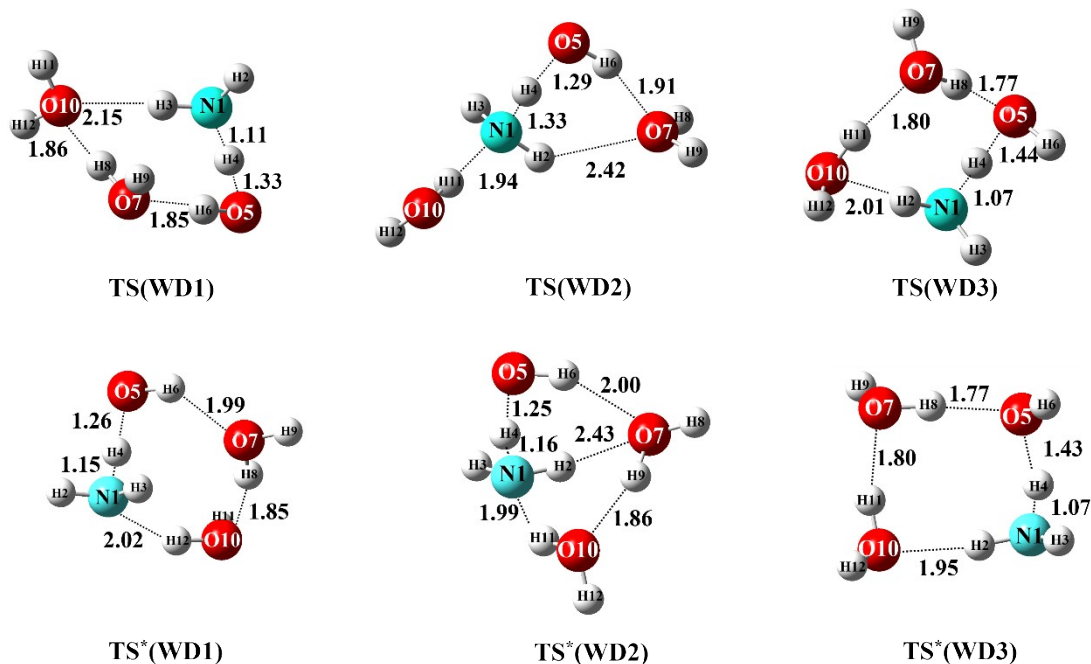

**Fig. S6** The transition state structure of  $\text{NH}_3 + \text{OH} + (\text{H}_2\text{O})_2$  reaction at the M06-2X/6-311+G(2d,2p) level in the gas and liquid phases (bond length Å). The ‘\*’ indicates the transition state structure in the gas phase.

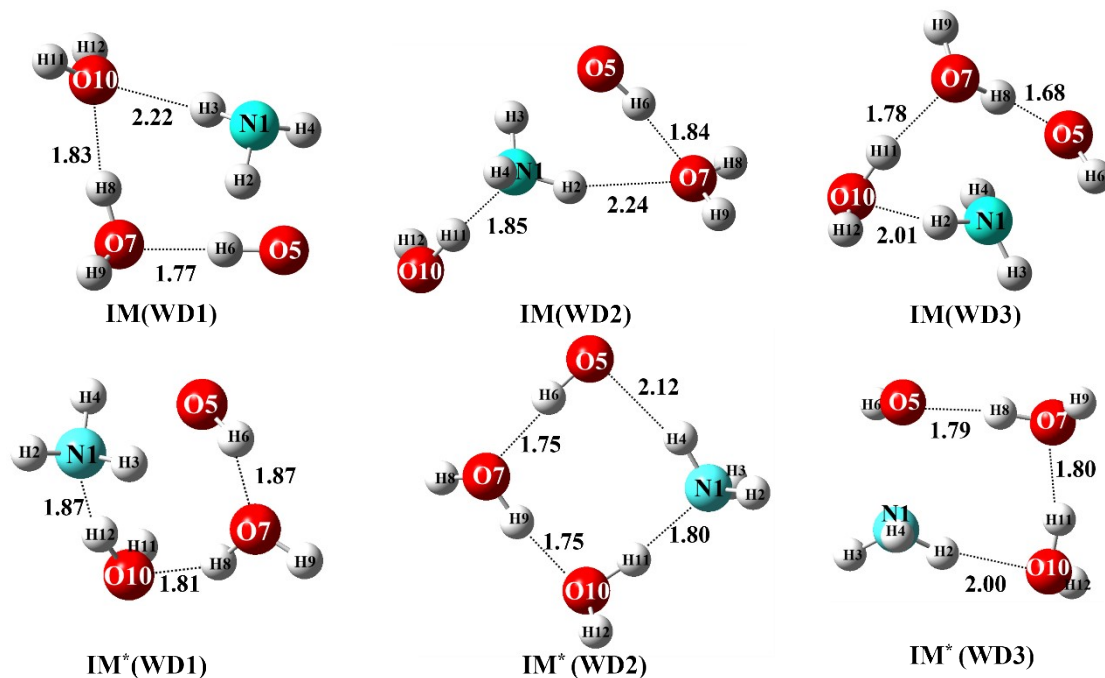

**Fig. S7** The precursor complexes structure of  $\text{NH}_3 + \text{OH} + (\text{H}_2\text{O})_2$  reaction at the M06-2X/6-311+G(2d,2p) level in the gas and liquid phases (bond length Å). The ‘\*’ indicates the structure in the gas phase.

**Table S5** Hydrogen bonding bond energy(kcal·mol<sup>-1</sup>) in the precursor complex of the NH<sub>3</sub> + OH + (H<sub>2</sub>O)<sub>2</sub> reaction.

|     | liquid |                 | gas    |                 |
|-----|--------|-----------------|--------|-----------------|
|     |        | $E_{\text{HB}}$ |        | $E_{\text{HB}}$ |
| WD1 | H3-O10 | -2.13           | H6-O7  | -4.23           |
|     | H6-O7  | -5.01           | H8-O10 | -5.03           |
|     | H8-O10 | -4.46           | H12-N1 | -4.78           |
| WD2 | H2-O7  | -2.08           | H4-O5  | -2.56           |
|     | H6-O7  | -4.40           | H6-O7  | -5.18           |
|     | H11-N1 | -4.90           | H9-O10 | -5.26           |
|     |        |                 | H11-N1 | -5.22           |
| WD3 | H2-O10 | -3.37           | H2-O10 | -3.37           |
|     | H8-O5  | -5.76           | H8-O5  | -4.64           |
|     | H11-O7 | -5.09           | H11-O7 | -4.86           |

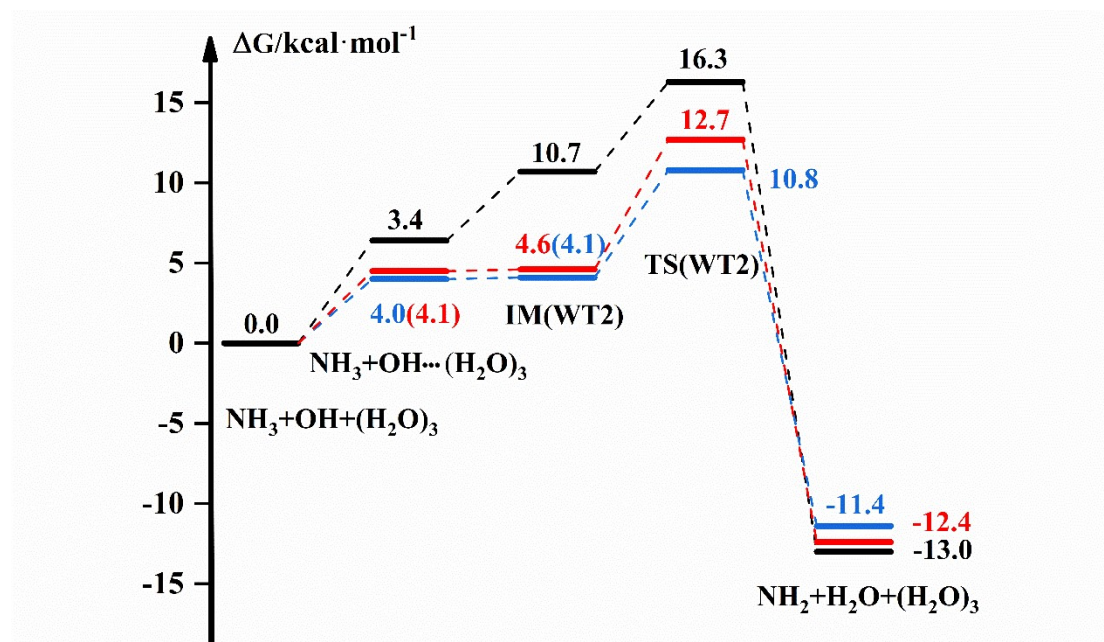



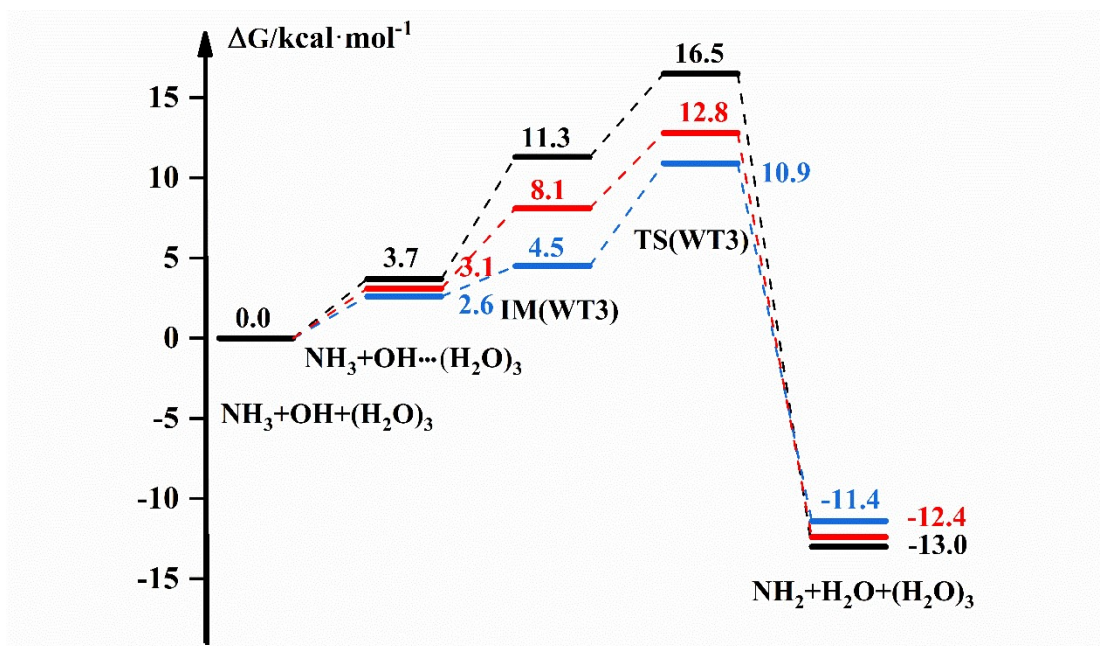

**Fig. S8** The free energy diagram for the  $\text{NH}_3 + \text{OH} + (\text{H}_2\text{O})_3$  reaction at the M06-2X/6-311+G(2d,2p) level (blue line) and the CCSD(T)-F12a/cc-pVDZ-F12//M06-2X/6-311+G(2d,2p) level (red line) in the gas phase and at the M06-2X/6-311+G(2d,2p) level in the liquid phase (black line).

**Table S6** Relative free energy ( $\text{kcal}\cdot\text{mol}^{-1}$ ) relative to reactants for  $\text{NH}_3 + \text{OH} + (\text{H}_2\text{O})_3 \rightarrow \text{NH}_2 + \text{H}_2\text{O} + (\text{H}_2\text{O})_3$  reaction.

|     |            | $\Delta G_1$ | $\Delta G_2$ | $\Delta G_3$ |
|-----|------------|--------------|--------------|--------------|
| WT1 | DFT(s)     | 2.2          | 9.7          | 15.1         |
|     | DFT(g)     | -1.2         | 1.3          | 7.7          |
|     | CCSD(T)(g) | -1.0         | 4.1          | 9.6          |
| WT2 | DFT(s)     | 3.4          | 10.7         | 16.3         |
|     | DFT(g)     | 4.0          | 4.1          | 10.8         |
|     | CCSD(T)(g) | 4.5          | 4.1          | 12.7         |
| WT3 | DFT(s)     | 3.7          | 11.3         | 16.5         |
|     | DFT(g)     | 2.6          | 4.5          | 10.9         |
|     | CCSD(T)(g) | 3.1          | 8.1          | 12.8         |

$\Delta G_1$  is the energy of the bimolecular complex relative to the reactants and  $\Delta G_2$  is the energy of the IM relative to the reactants.  $\Delta G_3$  is the energy of TS relative to the reactants.

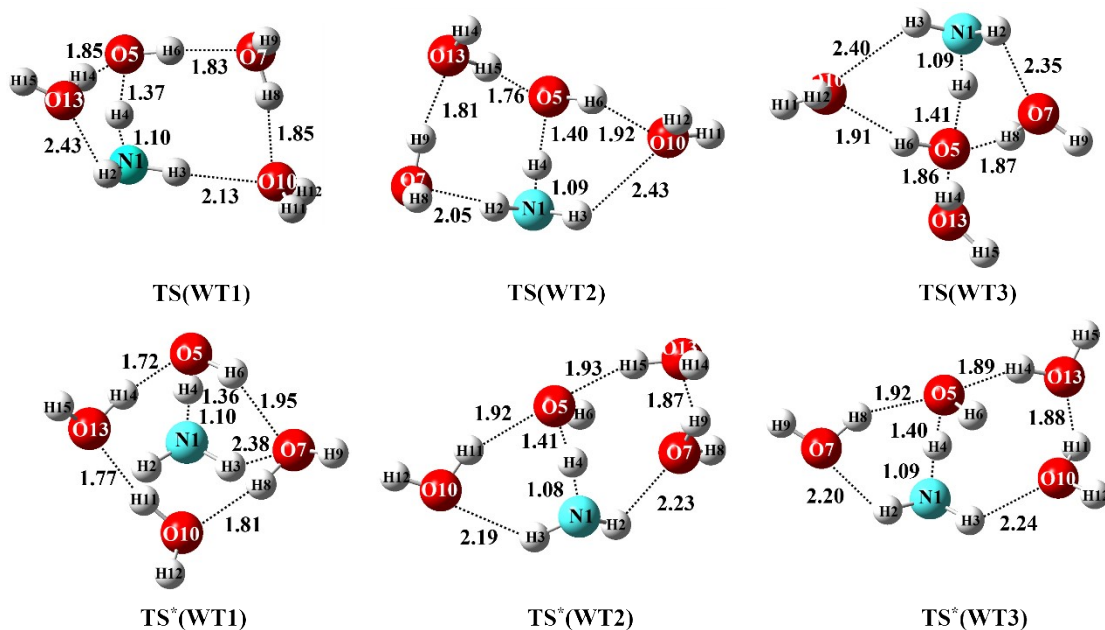

**Fig. S9** The transition state structure of  $\text{NH}_3+\text{OH}+(\text{H}_2\text{O})_3$  reaction at the M06-2X/6-311+G(2d,2p) level in the gas and liquid phases (bond length Å). The ‘\*’ indicates the transition state structure in the gas phase.

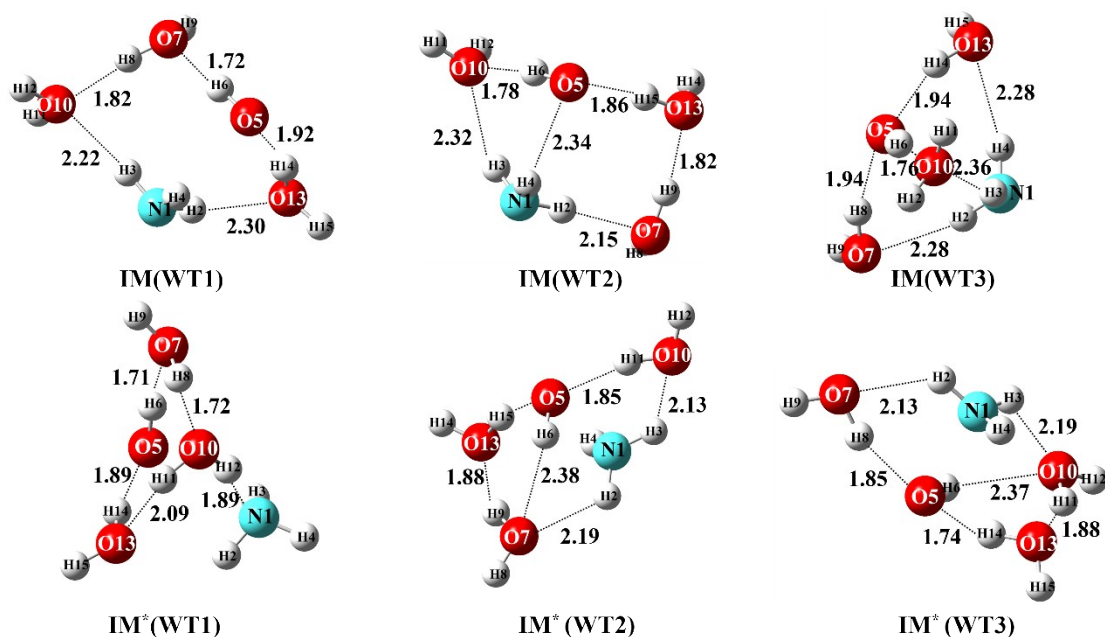

**Fig. S10** The precursor complexes structure of  $\text{NH}_3+\text{OH}+(\text{H}_2\text{O})_3$  reaction at the M06-2X/6-311+G(2d,2p) level in the gas and liquid phases (bond length Å). The ‘\*’ indicates the structure in the gas phase.

**Table S7** Hydrogen bonding bond energy(kcal·mol<sup>-1</sup>) in the precursor complex of the NH<sub>3</sub> + OH + (H<sub>2</sub>O)<sub>3</sub> reaction.

|     | liquid |                 | gas     |                 |
|-----|--------|-----------------|---------|-----------------|
|     |        | $E_{\text{HB}}$ |         | $E_{\text{HB}}$ |
| WT1 | H2-O13 | -1.77           | H6-O7   | -5.58           |
|     | H3-O10 | -2.13           | H8-O10  | -5.72           |
|     | H6-O7  | -5.42           | H11-O13 | -2.88           |
|     | H8-O10 | -4.58           | H12-N1  | -4.51           |
|     | H14-O5 | -3.76           | H14-O5  | -3.82           |
| WT2 | H2-O7  | -2.54           | H2-O7   | -2.58           |
|     | H3-O10 | -1.71           | H3-O10  | -2.72           |
|     | H4-O5  | -2.37           | H6-O7   | -1.48           |
|     | H6-O10 | -4.80           | H9-O13  | -4.18           |
|     | H9-O13 | -4.65           | H11-O5  | -4.54           |
|     | H15-O5 | -3.99           | H15-O5  | -5.57           |
| WT3 | H2-O7  | -1.81           | H2-O7   | -2.73           |
|     | H3-O10 | -1.52           | H3-O10  | -2.56           |
|     | H4-O13 | -1.82           | H6-O10  | -1.50           |
|     | H6-O10 | -5.04           | H8-O5   | -4.54           |
|     | H8-O5  | -3.58           | H11-O13 | -4.18           |
|     | H14-O5 | -3.57           | H14-O5  | -5.57           |

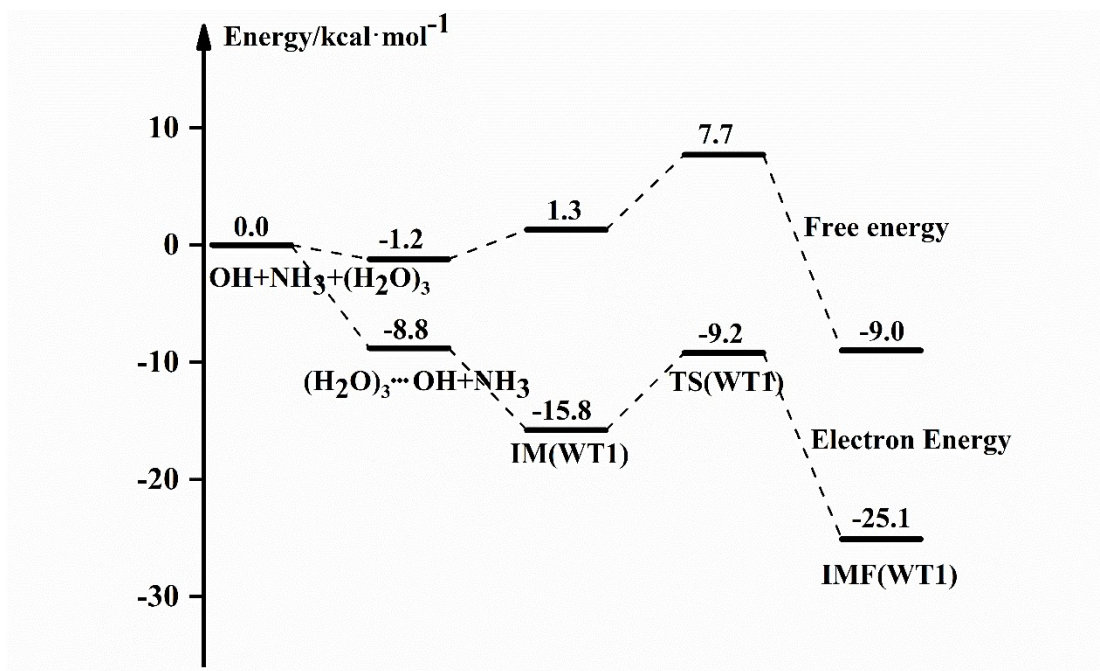

**Fig. S11** The electronic Energy and the free energy for the  $\text{NH}_3+\text{OH}+(\text{H}_2\text{O})_3$  reaction at the M06-2X/6-311+G(2d,2p) level in the gas phase.

**Table S8** Energy barriers( $\text{kcal}\cdot\text{mol}^{-1}$ ) and rate constants( $\text{cm}^3\cdot\text{molecules}^{-1}\cdot\text{s}^{-1}$ ) for the reaction  $\text{NH}_3+\text{OH}+(\text{H}_2\text{O})_n$  in the liquid phase.

|                             | $\Delta E$ | $\Delta(E+ZPE)$ | $\Delta G$ | $k'$     |
|-----------------------------|------------|-----------------|------------|----------|
| $(\text{H}_2\text{O})_5$    | 2.5        | 2.5             | 10.7       | 3.50E-15 |
| $(\text{H}_2\text{O})_7$    | 1.0        | 1.2             | 10.6       | 4.52E-15 |
| $(\text{H}_2\text{O})_8$    | 1.2        | 1.9             | 10.9       | 2.73E-15 |
| $(\text{H}_2\text{O})_{10}$ | 4.1        | 1.9             | 10.3       | 6.98E-15 |

$\Delta E$  is the electron energy barrier relative to reactants( $\text{NH}_3+\text{OH}\cdot(\text{H}_2\text{O})_n$ ),  $\Delta(E+ZEP)$  is the electronic energy barrier including the zero-point energy,  $\Delta G$  is the free energy barrier relative to reactants( $\text{NH}_3+\text{OH}\cdot(\text{H}_2\text{O})_n$ ),  $k'$  is the rate constant obtained with  $\Delta G$ .

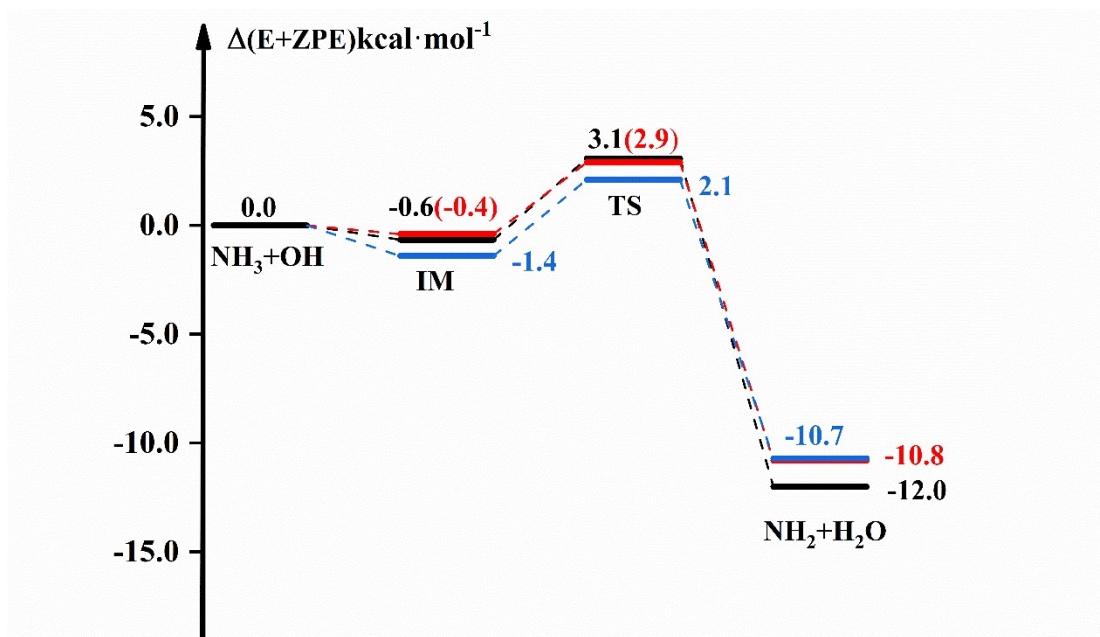

**Fig. S12** Schematic energy diagram for the  $\text{NH}_3+\text{OH}$  reaction at the M06-2X/6-311+G(2d,2p) level (blue line) and the CCSD(T)-F12a/cc-pVDZ-F12// M06-2X/6-311+G(2d,2p) level (red line) in the gas phase, and at the M06-2X/6-311+G(2d,2p) level under the implicit solvent model (black line).

**Table S9** Relative energy ( $\text{kcal}\cdot\text{mol}^{-1}$ ) relative to reactants for  $\text{NH}_3+\text{OH}\rightarrow\text{NH}_2+\text{H}_2\text{O}$  reaction.

|                     | $\Delta E_{IM}$ | $\Delta E_{TS}$ |
|---------------------|-----------------|-----------------|
| DFT( <i>s</i> )     | -0.6            | 3.1             |
| DFT( <i>g</i> )     | -1.4            | 2.1             |
| CCSD(T)( <i>g</i> ) | -0.4            | 2.9             |

$\Delta E_{IM}$  is the energy of the IM relative to the reactants and  $\Delta E_{TS}$  is the energy of the TS relative to the reactants. *s* and *g* represent the calculation result in the liquid and gas phases.

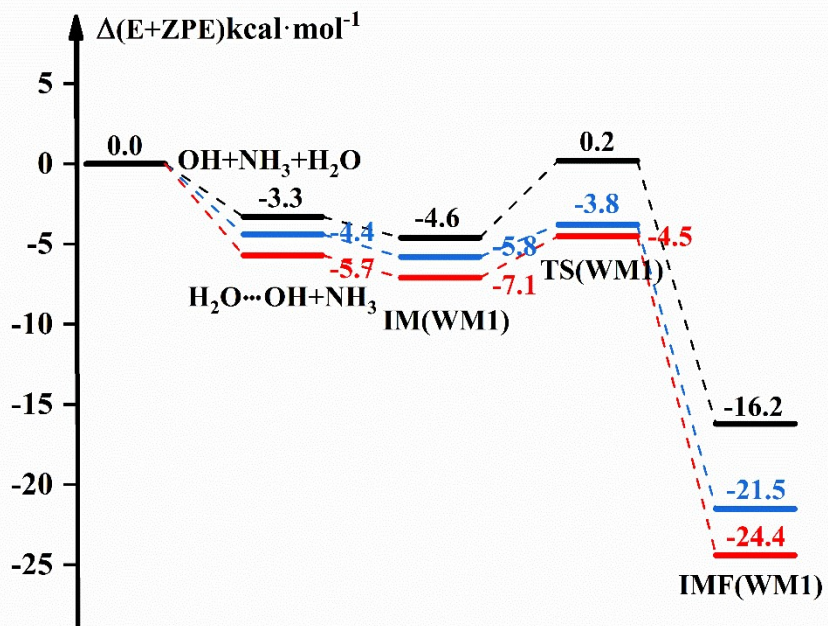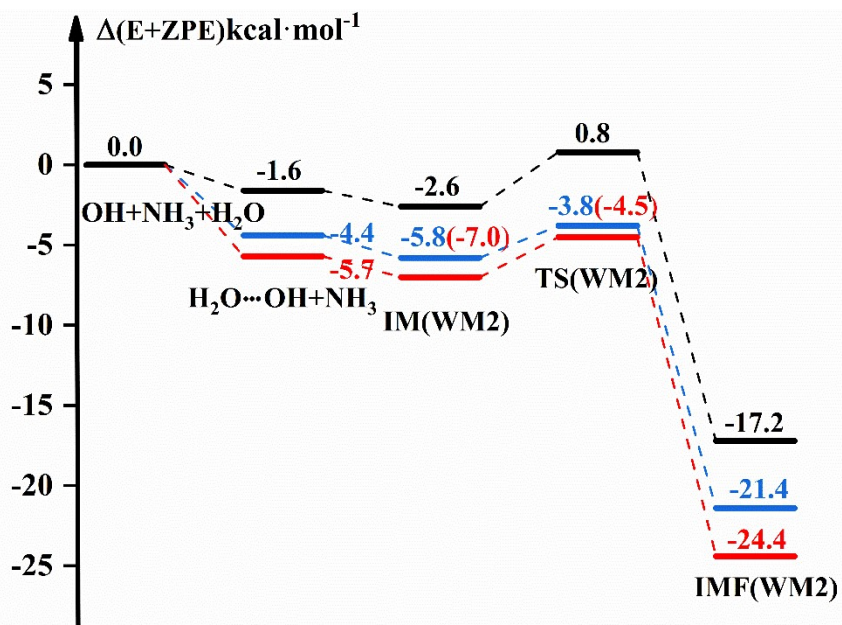

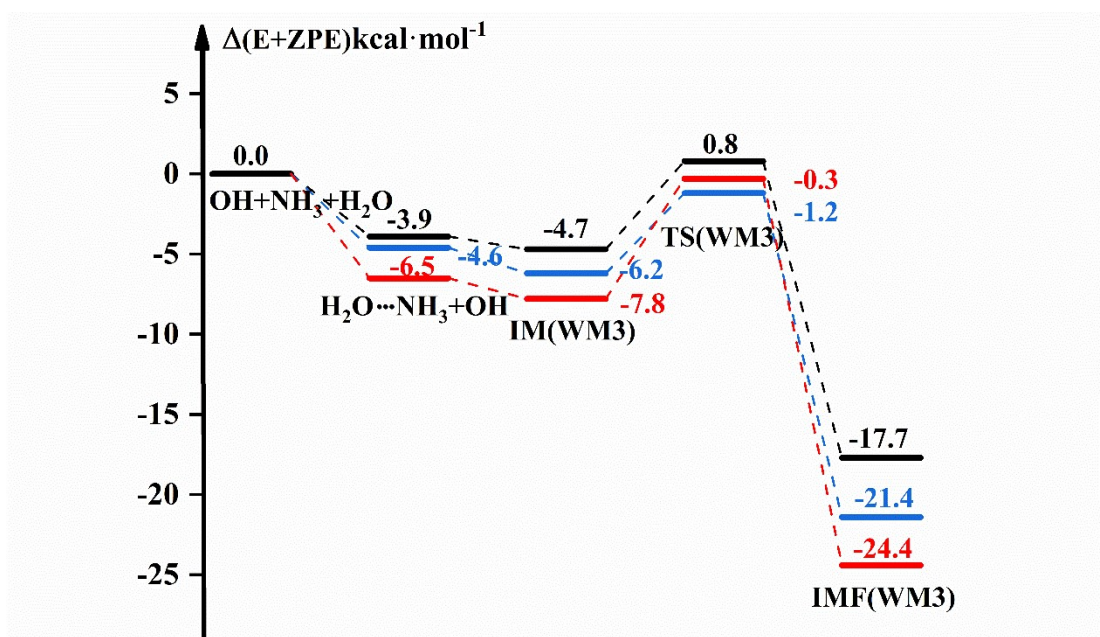

**Fig. S13** Schematic energy diagram for the  $\text{NH}_3+\text{OH}+\text{H}_2\text{O}$  reaction at the M06-2X/6-311+G(2d,2p) level (blue line) and the CCSD(T)-F12a/cc-pVDZ-F12// M06-2X/6-311+G(2d,2p) level (red line) in the gas phase, and at the M06-2X/6-311+G(2d,2p) level under the implicit solvent model (black line).

**Table S10** Relative electron energy ( $\text{kcal}\cdot\text{mol}^{-1}$ ) relative to reactants for  $\text{NH}_3+\text{OH}+\text{H}_2\text{O}\rightarrow\text{NH}_2+\text{H}_2\text{O}+\text{H}_2\text{O}$  reaction.

|     |                     | $\Delta E_1$ | $\Delta E_2$ | $\Delta E_3$ |
|-----|---------------------|--------------|--------------|--------------|
| WM1 | DFT( <i>s</i> )     | -3.3         | -4.6         | 0.2          |
|     | DFT( <i>g</i> )     | -4.4         | -5.8         | -3.8         |
|     | CCSD(T)( <i>g</i> ) | -5.7         | -7.1         | -4.5         |
| WM2 | DFT( <i>s</i> )     | -1.6         | -2.6         | 0.8          |
|     | DFT( <i>g</i> )     | -4.4         | -5.8         | -3.8         |
|     | CCSD(T)( <i>g</i> ) | -5.7         | -7.0         | -4.5         |
| WM3 | DFT( <i>s</i> )     | -3.9         | -4.7         | 0.8          |
|     | DFT( <i>g</i> )     | -4.6         | -6.2         | -1.2         |
|     | CCSD(T)( <i>g</i> ) | -6.5         | -7.8         | -0.3         |

$\Delta E_1$  is the energy of the bimolecular complex relative to the reactants and  $\Delta E_2$  is the energy of the IM relative to the reactants.  $\Delta E_3$  is the energy of TS relative to the reactants.

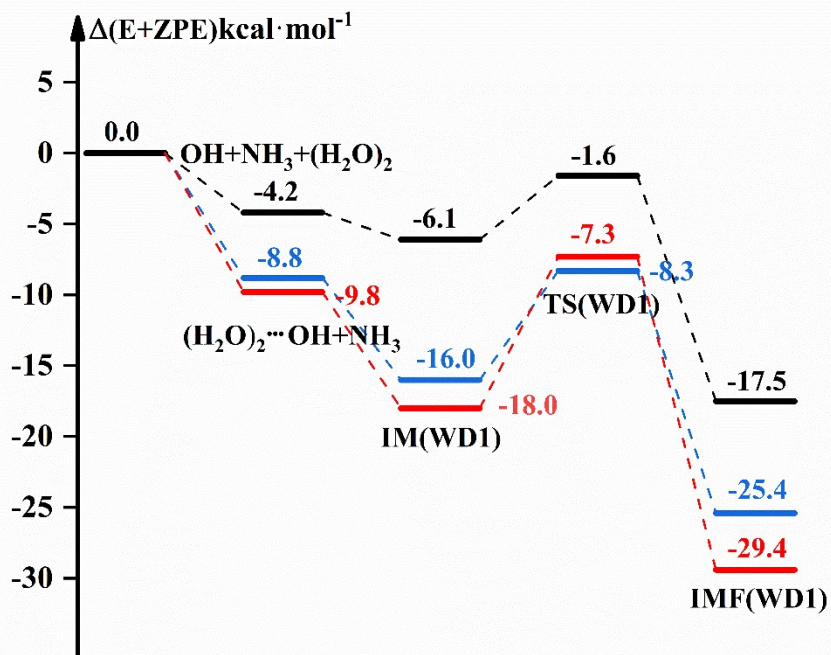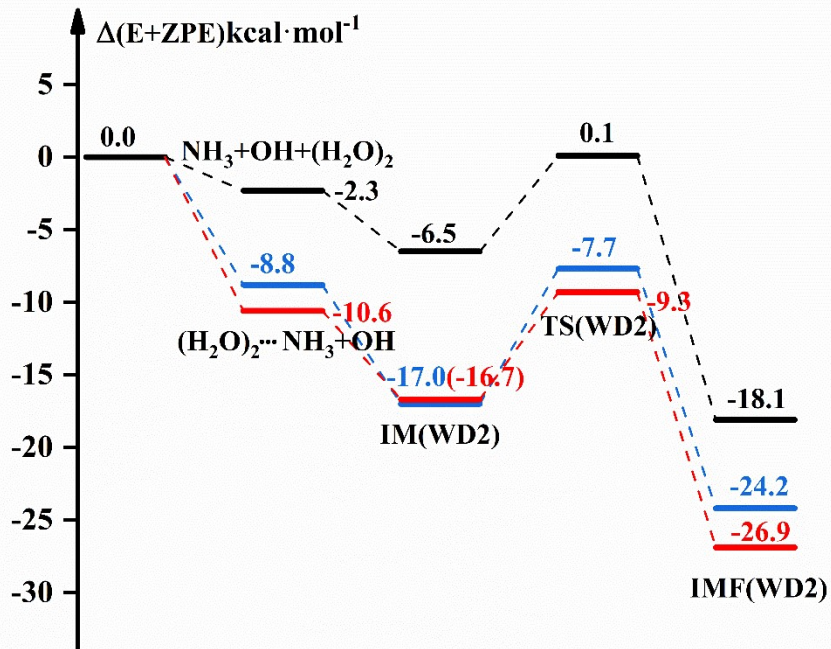



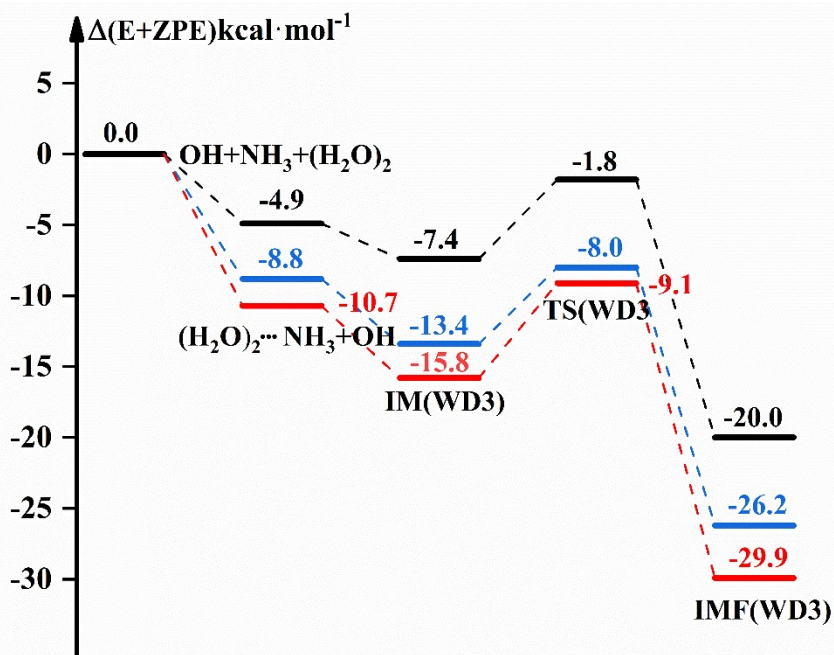

**Fig. S14** Schematic energy diagram for the  $\text{NH}_3+\text{OH}+(\text{H}_2\text{O})_2$  reaction at the M06-2X/6-311+G(2d,2p) level (blue line) and the CCSD(T)-F12a/cc-pVDZ-F12// M06-2X/6-311+G(2d,2p) level (red line) in the gas phase, and at the M06-2X/6-311+G(2d,2p) level under the implicit solvent model (black line).

**Table S11** Relative energy ( $\text{kcal}\cdot\text{mol}^{-1}$ ) relative to reactants for  $\text{NH}_3+\text{OH}+(\text{H}_2\text{O})_2\rightarrow\text{NH}_2+\text{H}_2\text{O}+(\text{H}_2\text{O})_2$  reaction.

|     |                     | $\Delta E_1$ | $\Delta E_2$ | $\Delta E_3$ |
|-----|---------------------|--------------|--------------|--------------|
| WD1 | DFT( <i>s</i> )     | -4.2         | -6.1         | -1.6         |
|     | DFT( <i>g</i> )     | -8.8         | -16.0        | -8.3         |
|     | CCSD(T)( <i>g</i> ) | -9.8         | -18.0        | -7.3         |
| WD2 | DFT( <i>s</i> )     | -2.3         | -6.5         | 0.1          |
|     | DFT( <i>g</i> )     | -8.8         | -17.0        | -7.7         |
|     | CCSD(T)( <i>g</i> ) | -10.6        | -16.7        | -9.3         |
| WD3 | DFT( <i>s</i> )     | -4.9         | -7.4         | -1.8         |
|     | DFT( <i>g</i> )     | -8.8         | -13.4        | -8.0         |
|     | CCSD(T)( <i>g</i> ) | -10.7        | -15.8        | -9.1         |

$\Delta E_1$  is the energy of the bimolecular complex relative to the reactants and  $\Delta E_2$  is the energy of the IM relative to the reactants.  $\Delta E_3$  is the energy of the TS relative to the reactants.

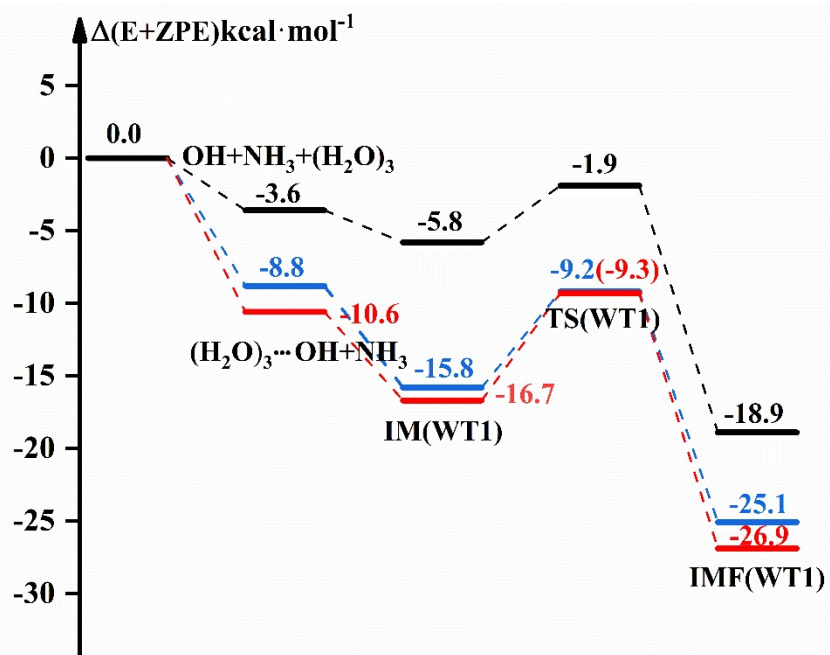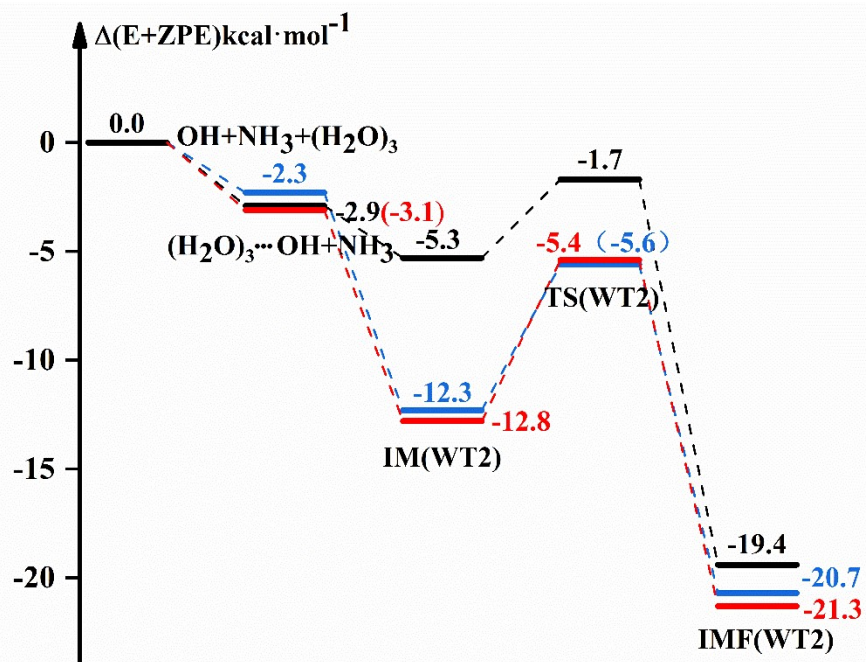

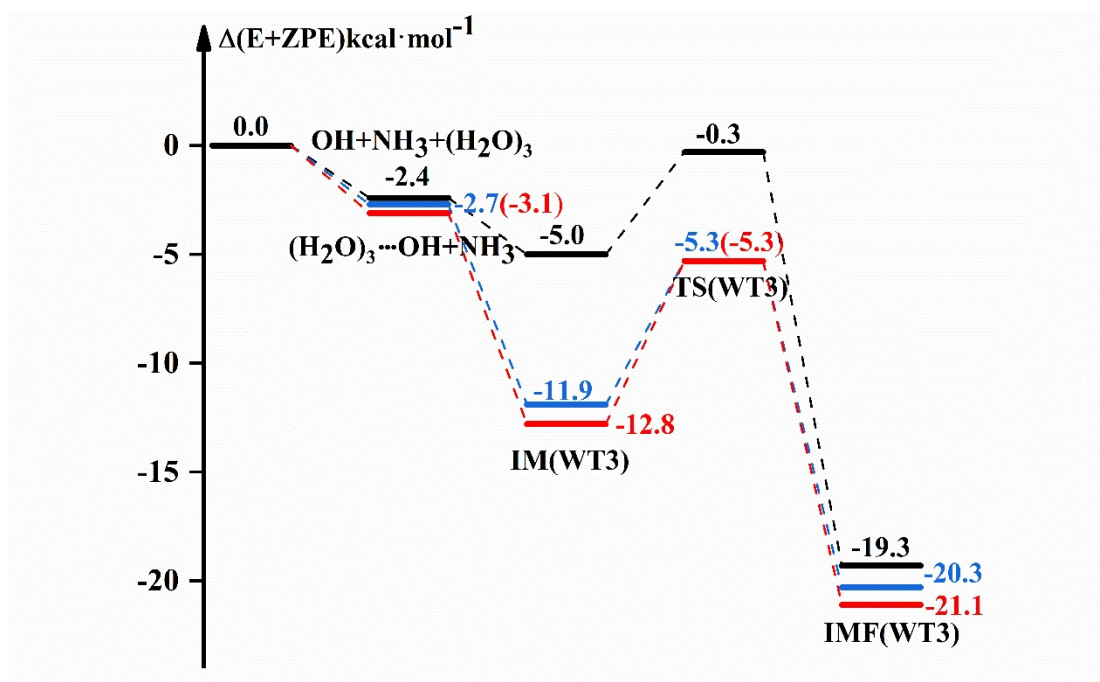

**Fig. S15** Schematic energy diagram for the  $\text{NH}_3+\text{OH}+(\text{H}_2\text{O})_3$  reaction at the M06-2X/6-311+G(2d,2p) level (blue line) and the CCSD(T)-F12a/cc-pVDZ-F12// M06-2X/6-311+G(2d,2p) level (red line) in the gas phase, and at the M06-2X/6-311+G(2d,2p) level under the implicit solvent model (black line).

**Table S12** Relative energy ( $\text{kcal}\cdot\text{mol}^{-1}$ ) relative to reactants for  $\text{NH}_3+\text{OH}+(\text{H}_2\text{O})_3\rightarrow\text{NH}_2+\text{H}_2\text{O}+(\text{H}_2\text{O})_3$  reaction.

|     |                     | $\Delta E_1$ | $\Delta E_2$ | $\Delta E_3$ |
|-----|---------------------|--------------|--------------|--------------|
| WT1 | DFT( <i>s</i> )     | -3.6         | -5.8         | -1.9         |
|     | DFT( <i>g</i> )     | -8.8         | -15.8        | -9.2         |
|     | CCSD(T)( <i>g</i> ) | -10.6        | -16.7        | -9.3         |
| WT2 | DFT( <i>s</i> )     | -2.9         | -5.3         | -1.7         |
|     | DFT( <i>g</i> )     | -2.3         | -12.3        | -5.6         |
|     | CCSD(T)( <i>g</i> ) | -3.1         | -12.8        | -5.4         |
| WT3 | DFT( <i>s</i> )     | -2.4         | -5.0         | -0.3         |
|     | DFT( <i>g</i> )     | -2.7         | -11.9        | -5.3         |
|     | CCSD(T)( <i>g</i> ) | -3.1         | -12.8        | -5.3         |

$\Delta E_1$  is the energy of the bimolecular complex relative to the reactants and  $\Delta E_2$  is the energy of the IM relative to the reactants.  $\Delta E_3$  is the energy of the TS relative to the reactants.

**Table S13** Transition state coordinates of  $\text{NH}_3+\text{OH}+(\text{H}_2\text{O})_n$  reaction optimized by M06-2X/6-311+G(2d,2p) in gas and liquid phases, where ‘\*’ denotes gas phase conditions.

|         |   | Cartesian Coordinate |             |             |
|---------|---|----------------------|-------------|-------------|
| TS(WM1) | N | -1.41147300          | -0.92891900 | -0.10291600 |

|          |   |             |             |             |
|----------|---|-------------|-------------|-------------|
|          | H | -1.72827200 | -1.02104100 | 0.85919000  |
|          | H | -0.47158600 | -1.32089200 | -0.13452800 |
|          | H | -1.30290800 | 0.15559300  | -0.31244900 |
|          | O | -0.67416700 | 1.28401900  | 0.02125000  |
|          | H | 0.24477300  | 0.96059800  | 0.05762700  |
|          | O | 1.73722000  | -0.25980900 | -0.00360000 |
|          | H | 2.38701400  | -0.11520600 | -0.69685200 |
|          | H | 2.24685700  | -0.35029400 | 0.80622200  |
|          | N | 1.24737300  | -1.00235500 | -0.10951200 |
|          | H | 0.29479800  | -1.34177200 | 0.00742100  |
|          | H | 1.72916100  | -1.07303400 | 0.78215700  |
| TS(WM2)  | H | 1.21380500  | 0.03097100  | -0.44351500 |
|          | O | 0.59802600  | 1.23355200  | -0.08764800 |
|          | H | 0.94199300  | 1.43512700  | 0.79367100  |
|          | O | -1.77563000 | -0.27737600 | 0.11044000  |
|          | H | -1.08718800 | 0.40338700  | 0.03445500  |
|          | H | -2.40335200 | -0.08760600 | -0.58994500 |
|          | N | -0.26595400 | 0.79911400  | 0.03944600  |
|          | H | -0.51586500 | 1.33637800  | 0.86654100  |
|          | H | -0.47927200 | 1.38446000  | -0.76560300 |
|          | H | -0.95282900 | -0.08573000 | 0.00071900  |
| TS(WM3)  | O | -2.14316100 | -0.61781000 | 0.02487600  |
|          | H | -2.71318300 | 0.01428200  | -0.43603400 |
|          | O | 2.39644400  | -0.43386300 | 0.03236900  |
|          | H | 2.97451700  | 0.18169900  | -0.42309800 |
|          | H | 1.52204200  | -0.01149400 | 0.02339800  |
|          | N | 1.12200200  | -1.06965400 | -0.10745800 |
|          | H | 0.13152300  | -1.30470400 | -0.04723200 |
|          | H | 1.54669500  | -1.21279600 | 0.80348200  |
|          | H | 1.20746600  | -0.02259000 | -0.41696000 |
| TS*(WM1) | O | 0.70056700  | 1.21496800  | -0.08764300 |
|          | H | 1.03588700  | 1.40895700  | 0.79685600  |
|          | O | -1.72495900 | -0.20599700 | 0.09436300  |
|          | H | -1.08918600 | 0.51839300  | -0.00825800 |
|          | H | -2.49126400 | 0.02855500  | -0.42943700 |
|          | N | 1.12185300  | -1.06969600 | -0.10743700 |
|          | H | 0.13136500  | -1.30474700 | -0.04739900 |
|          | H | 1.54637500  | -1.21284400 | 0.80358300  |
|          | H | 1.20740900  | -0.02264300 | -0.41694300 |
| TS*(WM2) | O | 0.70060700  | 1.21496800  | -0.08762700 |
|          | H | 1.03606400  | 1.40895500  | 0.79682000  |
|          | O | -1.72475900 | -0.20608400 | 0.09412900  |
|          | H | -1.08904700 | 0.51840800  | -0.00816200 |
|          | H | -2.49192400 | 0.02966900  | -0.42786100 |

|          |   |             |             |             |
|----------|---|-------------|-------------|-------------|
|          | N | -0.31674400 | 0.74716700  | 0.18438700  |
|          | H | -0.58143600 | 1.12120700  | 1.09233300  |
|          | H | -0.48905500 | 1.48045500  | -0.49979800 |
|          | H | -1.02240000 | -0.11824200 | -0.03219000 |
| TS*(WM3) | O | -2.20214700 | -0.59668900 | -0.08859800 |
|          | H | -2.69962400 | -0.00041000 | -0.66379900 |
|          | O | 2.59209900  | 0.28895300  | -0.29988800 |
|          | H | 2.89266400  | -0.61816700 | -0.23694200 |
|          | H | 1.64938200  | 0.26276200  | -0.09288900 |
|          | N | -1.02668700 | -1.57216700 | 0.21563000  |
|          | H | -1.21223200 | -1.53348400 | 1.21474400  |
|          | H | -0.04424700 | -1.32619700 | 0.09023100  |
|          | H | -1.63479300 | -0.77776500 | -0.26034000 |
|          | O | -1.97825000 | 0.50845500  | -0.33294900 |
| TS(WD1)  | H | -1.14089100 | 0.98019000  | -0.14756600 |
|          | O | 0.53558300  | 1.71090900  | 0.14989400  |
|          | H | 1.14154600  | 0.95467700  | 0.08530300  |
|          | H | 0.64776100  | 2.05871600  | 1.03791800  |
|          | O | 1.98840800  | -0.67417800 | -0.18681300 |
|          | H | 2.64318900  | -0.93193700 | 0.46839500  |
|          | H | 2.42055000  | -0.78052300 | -1.03914100 |
|          | N | 0.49464500  | 0.07360700  | 0.72833800  |
|          | H | -0.13607500 | -0.72732900 | 0.71071900  |
|          | H | 0.44814800  | 0.45301400  | 1.67154400  |
|          | H | 0.01781800  | 0.84642700  | 0.04926600  |
|          | O | -1.02367400 | 1.52173000  | -0.28599000 |
| TS(WD2)  | H | -1.68631900 | 0.80505400  | -0.30653500 |
|          | O | -2.38708500 | -0.96550300 | -0.14321700 |
|          | H | -3.15433800 | -1.08883400 | 0.42226900  |
|          | H | -2.61037000 | -1.39835200 | -0.97178900 |
|          | O | 3.12776800  | -0.36115900 | -0.43414000 |
|          | H | 2.25733400  | -0.21430800 | -0.02523700 |
|          | H | 3.66521800  | -0.75145800 | 0.25816300  |
|          | N | 1.23195900  | -1.43580800 | -0.11099200 |
|          | H | 0.21248400  | -1.38294400 | -0.05189200 |
|          | H | 1.62162900  | -1.70337900 | 0.78702100  |
|          | H | 1.66287500  | -0.52266600 | -0.46944800 |
|          | O | 1.64363000  | 0.85906700  | -0.06262200 |
| TS(WD3)  | H | 2.03374400  | 0.85860000  | 0.82182800  |
|          | O | -1.00238200 | 1.56421000  | 0.09668600  |
|          | H | -0.04209000 | 1.38479200  | 0.02483200  |
|          | H | -1.22131300 | 2.13478100  | -0.64361300 |
|          | O | -1.76950100 | -1.07928900 | -0.08504700 |
|          | H | -1.64693500 | -0.11518700 | -0.00120400 |

|          |   |             |             |             |
|----------|---|-------------|-------------|-------------|
|          | H | -2.21807800 | -1.35524200 | 0.71728800  |
| TS*(WD1) | N | 0.87105400  | -1.07035600 | -0.80311900 |
|          | H | 1.74656600  | -1.46205300 | -1.14175200 |
|          | H | 0.63988500  | -0.29411200 | -1.42285100 |
|          | H | 1.13117300  | -0.57928200 | 0.20066600  |
|          | O | 1.61529300  | 0.34722800  | 0.90655400  |
|          | H | 1.05358200  | 1.07704300  | 0.58718800  |
|          | O | -0.59248500 | 1.51903500  | -0.45239000 |
|          | H | -1.18502400 | 0.82565900  | -0.11238000 |
|          | H | -1.13156400 | 2.29374100  | -0.61352500 |
|          | O | -1.73481800 | -0.86796900 | 0.39267000  |
|          | H | -1.69824800 | -1.04553600 | 1.33440300  |
|          | H | -0.95767300 | -1.30931900 | 0.01541200  |
| TS*(WD2) | N | 0.68335800  | -1.22073800 | 0.68098500  |
|          | H | 0.53595500  | -0.48062500 | 1.36699500  |
|          | H | 1.45727200  | -1.78279900 | 1.02758100  |
|          | H | 1.11265900  | -0.68107200 | -0.25008000 |
|          | O | 1.80085000  | 0.22304700  | -0.76468000 |
|          | H | 1.25623300  | 0.97789800  | -0.47438900 |
|          | O | -0.41209000 | 1.56073200  | 0.46088600  |
|          | H | -0.78070400 | 2.44460200  | 0.45713300  |
|          | H | -1.08820400 | 0.97457000  | 0.07979100  |
|          | O | -1.82992300 | -0.62139100 | -0.51708800 |
|          | H | -1.10401300 | -1.17200200 | -0.18128400 |
|          | H | -2.64339800 | -1.03451000 | -0.22558400 |
| TS*(WD3) | N | 1.37379600  | -1.31756100 | -0.17070700 |
|          | H | 0.35531600  | -1.39333100 | -0.09701300 |
|          | H | 1.81064200  | -1.60410800 | 0.69804300  |
|          | H | 1.69154800  | -0.33616400 | -0.47141300 |
|          | O | 1.52390800  | 1.00167000  | 0.00564600  |
|          | H | 1.90440000  | 1.02733500  | 0.89194500  |
|          | O | -1.17980100 | 1.47599100  | 0.04042500  |
|          | H | -0.20508700 | 1.39441800  | 0.02524700  |
|          | H | -1.41111300 | 2.03242300  | -0.70431000 |
|          | O | -1.58497500 | -1.23832100 | -0.01936400 |
|          | H | -1.62291800 | -0.26441400 | 0.00468200  |
|          | H | -2.21241200 | -1.54795300 | 0.63411200  |
| TS(WT1)  | N | 0.36823900  | -1.39914300 | 0.85036700  |
|          | H | 1.00419200  | -1.60595200 | 0.08308600  |
|          | H | -0.56592000 | -1.27108000 | 0.46100600  |
|          | H | 0.70171700  | -0.46735700 | 1.31981600  |
|          | O | 1.03463000  | 0.83002800  | 1.02206900  |
|          | H | 0.22834700  | 1.17090100  | 0.58055100  |
|          | O | -1.34465000 | 1.65574700  | -0.22363300 |

|          |   |             |             |             |
|----------|---|-------------|-------------|-------------|
|          | H | -1.83833900 | 0.82780800  | -0.34296300 |
|          | H | -1.22090300 | 2.01469400  | -1.10575700 |
|          | O | -2.51579900 | -0.89517800 | -0.29976500 |
|          | H | -2.73342800 | -1.29078300 | -1.14874300 |
|          | H | -3.28697700 | -1.03668700 | 0.25686500  |
|          | O | 2.67945300  | -0.20947300 | -0.99016700 |
|          | H | 2.20510000  | 0.28605400  | -0.29970600 |
|          | H | 3.61096600  | -0.04045200 | -0.83523500 |
|          | N | -0.34815800 | -1.46933500 | 0.75388400  |
|          | H | 0.56502000  | -1.40690200 | 0.29833400  |
|          | H | -1.06536000 | -1.58428200 | 0.04144700  |
|          | H | -0.55635900 | -0.55779000 | 1.30939300  |
|          | O | -0.74998300 | 0.80017800  | 1.04373800  |
|          | H | -1.47422600 | 0.73421500  | 0.39429200  |
|          | O | 2.43987800  | -1.02163800 | -0.43118600 |
| TS(WT2)  | H | 2.55039300  | -1.26261500 | -1.35344300 |
|          | H | 2.24266800  | -0.06659600 | -0.42948700 |
|          | O | -2.73668700 | -0.04346400 | -0.82258100 |
|          | H | -3.65717900 | 0.02724900  | -0.55523400 |
|          | H | -2.70841200 | 0.29022600  | -1.72345000 |
|          | O | 1.59669500  | 1.59497500  | -0.11536200 |
|          | H | 1.42381200  | 2.09529300  | -0.91620100 |
|          | H | 0.71752000  | 1.37614700  | 0.26029500  |
|          | N | -0.85422400 | 0.01654000  | 1.63719900  |
|          | H | -1.56036600 | -0.66716000 | 1.37142100  |
|          | H | -1.20425500 | 0.94706000  | 1.41829800  |
|          | H | 0.04781000  | -0.16432000 | 1.05888300  |
|          | O | 0.37877300  | -0.20366000 | -0.30789500 |
|          | H | 0.07310000  | 0.68037600  | -0.58573600 |
|          | O | -1.81157700 | -1.94164700 | -0.59171200 |
| TS(WT3)  | H | -0.98925400 | -1.43011300 | -0.66845100 |
|          | H | -1.59932600 | -2.82295400 | -0.90555400 |
|          | O | -0.83252800 | 2.35687500  | -0.48724800 |
|          | H | -0.30869300 | 3.15684000  | -0.58365200 |
|          | H | -1.57912800 | 2.46878200  | -1.08214900 |
|          | O | 3.19152000  | -0.31884700 | 0.01370200  |
|          | H | 2.22768600  | -0.28620000 | -0.09632300 |
|          | H | 3.46249500  | -1.13985200 | -0.40191700 |
|          | N | 0.08902900  | -1.19681400 | 1.50148700  |
|          | H | -0.62693700 | -0.47870500 | 1.58555800  |
|          | H | 0.98241800  | -0.72133800 | 1.38986200  |
| TS*(WT1) | H | -0.10243400 | -1.79109600 | 0.59353500  |
|          | O | -0.24123900 | -1.59920300 | -0.75005900 |
|          | H | 0.59349800  | -1.14408500 | -0.96319000 |

|                                      |   |             |             |             |
|--------------------------------------|---|-------------|-------------|-------------|
|                                      | O | 2.00803000  | 0.14404800  | -0.57326600 |
|                                      | H | 1.48173400  | 0.92129400  | -0.31640200 |
|                                      | H | 2.73483300  | 0.46140900  | -1.10970000 |
|                                      | O | 0.12548800  | 1.88550200  | 0.40324200  |
|                                      | H | -0.72064500 | 1.53616100  | 0.06256400  |
|                                      | H | 0.00737600  | 2.82453500  | 0.54713700  |
|                                      | O | -1.99432100 | 0.40196400  | -0.40352500 |
|                                      | H | -1.45443500 | -0.37734400 | -0.66883500 |
|                                      | H | -2.70226700 | 0.48837900  | -1.04206600 |
|                                      | N | -0.67491100 | -0.64196900 | 1.30791300  |
|                                      | H | -0.10069700 | -1.39630900 | 0.93612500  |
|                                      | H | -1.65810500 | -0.81661200 | 1.10522800  |
|                                      | H | -0.38331300 | 0.28593200  | 0.82787500  |
|                                      | O | -0.32427200 | 0.80782900  | -0.48141100 |
|                                      | H | 0.04281000  | 0.06089900  | -0.98292800 |
|                                      | O | 1.54219500  | -1.40983600 | -0.57581600 |
| TS*(WT2)                             | H | 2.09984200  | -1.98290000 | -1.10314800 |
|                                      | H | 2.10132000  | -0.67358000 | -0.27569300 |
|                                      | O | -3.04537700 | 0.10581900  | -0.32284800 |
|                                      | H | -2.23043600 | 0.56337300  | -0.57940900 |
|                                      | H | -3.76751300 | 0.70475200  | -0.51249800 |
|                                      | O | 2.39617500  | 1.11542300  | 0.17663700  |
|                                      | H | 2.60530100  | 1.45733600  | 1.04689000  |
|                                      | H | 1.46538700  | 1.33700800  | 0.00966900  |
|                                      | N | -0.70691900 | 0.70749700  | 1.28542100  |
|                                      | H | -1.67761400 | 0.88747700  | 1.03299500  |
|                                      | H | -0.10020700 | 1.43466500  | 0.91079700  |
|                                      | H | -0.40480000 | -0.25222400 | 0.86888400  |
|                                      | O | -0.31063100 | -0.83294000 | -0.40621200 |
|                                      | H | 0.03394900  | -0.10665900 | -0.95042800 |
|                                      | O | 3.03364200  | -0.13604900 | -0.36439900 |
| TS*(WT3)                             | H | -2.20994100 | -0.61101300 | -0.55437600 |
|                                      | H | -3.74418400 | -0.76912400 | -0.46717700 |
|                                      | O | 1.53606900  | 1.39742100  | -0.62093300 |
|                                      | H | 2.11536400  | 0.67751100  | -0.32108200 |
|                                      | H | 2.09288200  | 2.03075200  | -1.07484400 |
|                                      | O | 2.36653500  | -1.07016200 | 0.31917200  |
|                                      | H | 1.45212100  | -1.31294900 | 0.09537400  |
|                                      | H | 2.92421800  | -1.79707200 | 0.04088300  |
|                                      | O | 1.59176600  | -0.01753400 | 0.57761600  |
|                                      | H | 1.01010000  | -0.73996800 | 0.25482300  |
| TS[(H <sub>2</sub> O) <sub>5</sub> ] | O | -0.38658800 | -1.93940900 | 0.15832200  |
|                                      | H | -1.03454600 | -1.66187200 | -0.50531600 |
|                                      | H | -0.69825900 | -1.54516700 | 0.98980800  |



|                                      |   |             |             |             |
|--------------------------------------|---|-------------|-------------|-------------|
|                                      | O | -2.37280500 | -0.81324200 | -1.59391400 |
|                                      | H | -3.24480600 | -1.21908100 | -1.59253200 |
|                                      | H | -2.16297300 | -0.65087000 | -2.51840500 |
|                                      | O | -0.80784400 | -0.16536800 | 2.32326000  |
|                                      | H | 0.12893500  | 0.05653500  | 2.35214000  |
|                                      | H | -1.18522200 | 0.44431900  | 1.65825700  |
|                                      | O | 0.66593900  | 2.29303400  | -0.60734500 |
|                                      | H | 0.82682000  | 2.30047400  | -1.55388000 |
|                                      | H | 1.09515100  | 1.48302000  | -0.26811700 |
|                                      | O | -1.82279000 | 1.35264300  | 0.23852400  |
|                                      | H | -1.02360300 | 1.76471100  | -0.13603400 |
|                                      | H | -2.09412600 | 0.68885000  | -0.41152800 |
|                                      | N | 3.44702900  | -0.67660000 | -0.68268100 |
|                                      | H | 3.37086900  | 0.05853700  | -1.37956800 |
|                                      | H | 3.05899100  | -1.52688600 | -1.08161600 |
|                                      | H | 2.88204500  | -0.39738800 | 0.19904200  |
|                                      | O | -1.87110900 | -2.31494600 | -0.77937400 |
|                                      | H | -2.24472300 | -1.42946500 | -0.95218500 |
|                                      | H | -2.58468300 | -2.83654800 | -0.40475600 |
|                                      | O | -0.07499100 | -1.01402000 | 0.85981900  |
|                                      | H | -0.58385300 | -1.68479200 | 0.36996100  |
|                                      | H | 0.83507900  | -1.34260700 | 0.99104000  |
|                                      | O | -1.84839700 | 0.92179100  | 1.61296800  |
|                                      | H | -1.23741500 | 0.16458600  | 1.63538100  |
|                                      | H | -2.37723800 | 0.88100000  | 2.41328200  |
|                                      | O | 3.05793500  | 0.27446500  | -1.03035900 |
|                                      | H | 2.14893900  | 0.59730600  | -1.17715400 |
|                                      | H | 3.58170300  | 1.04936600  | -0.81242200 |
| TS[(H <sub>2</sub> O) <sub>6</sub> ] | O | -2.51483200 | 0.37071100  | -1.09096600 |
|                                      | H | -2.51317800 | 0.62759600  | -0.15467200 |
|                                      | H | -1.64838400 | 0.66641700  | -1.40755800 |
|                                      | O | 2.61953300  | -1.51851400 | 1.03324900  |
|                                      | H | 2.88464600  | -0.92306900 | 0.30592000  |
|                                      | H | 2.95335500  | -2.38761400 | 0.79852100  |
|                                      | O | 0.33467300  | 0.87130200  | -1.17197700 |
|                                      | H | 0.19645800  | 0.24005000  | -0.43122200 |
|                                      | N | 0.28085500  | 2.66802700  | 0.32800500  |
|                                      | H | -0.42684400 | 2.27702600  | 0.95109600  |
|                                      | H | 1.19815700  | 2.52710800  | 0.74155600  |
|                                      | H | 0.22949800  | 2.17114000  | -0.62970100 |
|                                      | O | 2.92675800  | -0.37776600 | 0.52620000  |
| TS[(H <sub>2</sub> O) <sub>7</sub> ] | H | 2.64052900  | 0.46148900  | 0.11000000  |
|                                      | O | -2.40818600 | 1.53958400  | -0.27813800 |
|                                      | H | -2.86157500 | 0.70170100  | -0.11070800 |

|                                      |   |             |             |             |
|--------------------------------------|---|-------------|-------------|-------------|
|                                      | H | -1.73801100 | 1.62207200  | 0.42544800  |
|                                      | O | -3.47053200 | -1.14750100 | 0.01549700  |
|                                      | H | -4.01480100 | -1.44816300 | -0.71851000 |
|                                      | H | -3.95238300 | -1.39057500 | 0.81171800  |
|                                      | O | 1.66878400  | 1.82922400  | -0.64841000 |
|                                      | H | 0.97739600  | 1.39270200  | -1.19832800 |
|                                      | H | 2.05760700  | 2.53015200  | -1.17709700 |
|                                      | O | 0.74421400  | -0.78900000 | 2.06063600  |
|                                      | H | 0.90680100  | -1.23228900 | 2.89667800  |
|                                      | H | 1.60931200  | -0.70572500 | 1.59841200  |
|                                      | O | -0.67479100 | -1.72428500 | -0.13023700 |
|                                      | H | -0.31255000 | -1.46581500 | 0.73513700  |
|                                      | H | -1.63901300 | -1.67130500 | -0.04728500 |
|                                      | O | -0.24169500 | 1.80616100  | 1.46996400  |
|                                      | H | 0.45528200  | 2.01614000  | 0.82971100  |
|                                      | H | 0.01651100  | 0.94150500  | 1.82598900  |
|                                      | O | -0.33264900 | 0.48046900  | -1.82774400 |
|                                      | H | -1.10368900 | 0.98055400  | -1.50309200 |
|                                      | H | -0.37786200 | -0.33378300 | -1.29266600 |
|                                      | N | 2.20476600  | -1.61339200 | -1.32378700 |
|                                      | H | 2.86504700  | -1.29452300 | -0.52246900 |
|                                      | H | 1.30766300  | -1.91315600 | -0.94550100 |
|                                      | H | 2.03514800  | -0.83232600 | -1.95306900 |
|                                      | O | 2.92675800  | -0.37776600 | 0.52620000  |
|                                      | H | 2.64052900  | 0.46148900  | 0.11000000  |
|                                      | O | -2.40818600 | 1.53958400  | -0.27813800 |
|                                      | H | -2.86157500 | 0.70170100  | -0.11070800 |
|                                      | H | -1.73801100 | 1.62207200  | 0.42544800  |
|                                      | O | -3.47053200 | -1.14750100 | 0.01549700  |
|                                      | H | -4.01480100 | -1.44816300 | -0.71851000 |
|                                      | H | -3.95238300 | -1.39057500 | 0.81171800  |
|                                      | O | 1.66878400  | 1.82922400  | -0.64841000 |
|                                      | H | 0.97739600  | 1.39270200  | -1.19832800 |
| TS[(H <sub>2</sub> O) <sub>8</sub> ] | H | 2.05760700  | 2.53015200  | -1.17709700 |
|                                      | O | 0.74421400  | -0.78900000 | 2.06063600  |
|                                      | H | 0.90680100  | -1.23228900 | 2.89667800  |
|                                      | H | 1.60931200  | -0.70572500 | 1.59841200  |
|                                      | O | -0.67479100 | -1.72428500 | -0.13023700 |
|                                      | H | -0.31255000 | -1.46581500 | 0.73513700  |
|                                      | H | -1.63901300 | -1.67130500 | -0.04728500 |
|                                      | O | -0.24169500 | 1.80616100  | 1.46996400  |
|                                      | H | 0.45528200  | 2.01614000  | 0.82971100  |
|                                      | H | 0.01651100  | 0.94150500  | 1.82598900  |
|                                      | O | -0.33264900 | 0.48046900  | -1.82774400 |

|                                       |   |             |             |             |
|---------------------------------------|---|-------------|-------------|-------------|
|                                       | H | -1.10368900 | 0.98055400  | -1.50309200 |
|                                       | H | -0.37786200 | -0.33378300 | -1.29266600 |
|                                       | N | 2.20476600  | -1.61339200 | -1.32378700 |
|                                       | H | 2.86504700  | -1.29452300 | -0.52246900 |
|                                       | H | 1.30766300  | -1.91315600 | -0.94550100 |
|                                       | H | 2.03514800  | -0.83232600 | -1.95306900 |
|                                       | O | 2.08068600  | 1.68748700  | 0.96774500  |
|                                       | H | 1.88315000  | 2.15727700  | -0.81104300 |
|                                       | H | 2.57946900  | 0.85959100  | 1.05257700  |
|                                       | O | 3.00235800  | -0.89172600 | 0.43781300  |
|                                       | H | 3.88425500  | -1.26896300 | 0.48837900  |
|                                       | H | 2.75324200  | -0.86831500 | -0.51455800 |
|                                       | O | -0.38369100 | -2.31901200 | -1.53211700 |
|                                       | H | -1.20988400 | -1.91266800 | -1.19103400 |
|                                       | H | -0.64391700 | -3.11324900 | -2.00517300 |
|                                       | O | 1.95152400  | -0.70808600 | -2.05305100 |
|                                       | H | 1.75660900  | 0.24369200  | -2.07035100 |
|                                       | H | 1.09273100  | -1.14356500 | -1.92313700 |
|                                       | O | -1.26263600 | -1.00305500 | 2.20291100  |
|                                       | H | -0.50273300 | -1.50457700 | 1.82868600  |
|                                       | H | -1.55275200 | -1.49209700 | 2.97753000  |
|                                       | O | -2.66149900 | -1.38376800 | -0.29891800 |
|                                       | H | -3.05517700 | -0.56302300 | -0.64164100 |
|                                       | H | -2.26258800 | -1.14800200 | 0.55418900  |
| TS[(H <sub>2</sub> O) <sub>10</sub> ] | O | -0.23662800 | 1.58279700  | 2.49722800  |
|                                       | H | 1.40615900  | 1.69821000  | 1.67029600  |
|                                       | H | -0.60937200 | 0.68285200  | 2.41758100  |
|                                       | O | 0.73162600  | -2.47357200 | 1.06125900  |
|                                       | H | 1.56031400  | -1.97293600 | 0.99108500  |
|                                       | H | 0.39446200  | -2.51315000 | 0.14937700  |
|                                       | O | -3.68626800 | 1.06484700  | -1.26746300 |
|                                       | H | -0.30713300 | 1.81800700  | 3.42569000  |
|                                       | H | -4.46518200 | 1.38177300  | -0.80380800 |
|                                       | O | 1.61805200  | 2.12917500  | -1.74666900 |
|                                       | H | 2.23741700  | 2.69242900  | -2.21763000 |
|                                       | H | -2.94796700 | 1.62792500  | -0.96714500 |
|                                       | H | 0.69727100  | 0.56540100  | 0.13454400  |
|                                       | O | -0.10811600 | 0.10966700  | -0.17091600 |
|                                       | N | -1.21945000 | 2.17457700  | -0.36865600 |
|                                       | H | -0.94588200 | 1.08990900  | -0.37520900 |
|                                       | H | -1.04741900 | 2.47854400  | 0.58983600  |
|                                       | H | -0.52218700 | 2.62487100  | -0.96101600 |
| TS[(H <sub>2</sub> O) <sub>11</sub> ] | O | 2.08068600  | 1.68748700  | 0.96774500  |
|                                       | H | 1.88315000  | 2.15727700  | -0.81104300 |

|                                       |   |             |             |             |
|---------------------------------------|---|-------------|-------------|-------------|
|                                       | H | 2.57946900  | 0.85959100  | 1.05257700  |
|                                       | O | 3.00235800  | -0.89172600 | 0.43781300  |
|                                       | H | 3.88425500  | -1.26896300 | 0.48837900  |
|                                       | H | 2.75324200  | -0.86831500 | -0.51455800 |
|                                       | O | -0.38369100 | -2.31901200 | -1.53211700 |
|                                       | H | -1.20988400 | -1.91266800 | -1.19103400 |
|                                       | H | -0.64391700 | -3.11324900 | -2.00517300 |
|                                       | O | 1.95152400  | -0.70808600 | -2.05305100 |
|                                       | H | 1.75660900  | 0.24369200  | -2.07035100 |
|                                       | H | 1.09273100  | -1.14356500 | -1.92313700 |
|                                       | O | -1.26263600 | -1.00305500 | 2.20291100  |
|                                       | H | -0.50273300 | -1.50457700 | 1.82868600  |
|                                       | H | -1.55275200 | -1.49209700 | 2.97753000  |
|                                       | O | -2.66149900 | -1.38376800 | -0.29891800 |
|                                       | H | -3.05517700 | -0.56302300 | -0.64164100 |
|                                       | H | -2.26258800 | -1.14800200 | 0.55418900  |
|                                       | O | -0.23662800 | 1.58279700  | 2.49722800  |
|                                       | H | 1.40615900  | 1.69821000  | 1.67029600  |
|                                       | H | -0.60937200 | 0.68285200  | 2.41758100  |
|                                       | O | 0.73162600  | -2.47357200 | 1.06125900  |
|                                       | H | 1.56031400  | -1.97293600 | 0.99108500  |
|                                       | H | 0.39446200  | -2.51315000 | 0.14937700  |
|                                       | O | -3.68626800 | 1.06484700  | -1.26746300 |
|                                       | H | -0.30713300 | 1.81800700  | 3.42569000  |
|                                       | H | -4.46518200 | 1.38177300  | -0.80380800 |
|                                       | O | 1.61805200  | 2.12917500  | -1.74666900 |
|                                       | H | 2.23741700  | 2.69242900  | -2.21763000 |
|                                       | H | -2.94796700 | 1.62792500  | -0.96714500 |
|                                       | H | 0.69727100  | 0.56540100  | 0.13454400  |
|                                       | O | -0.10811600 | 0.10966700  | -0.17091600 |
|                                       | N | -1.21945000 | 2.17457700  | -0.36865600 |
|                                       | H | -0.94588200 | 1.08990900  | -0.37520900 |
|                                       | H | -1.04741900 | 2.47854400  | 0.58983600  |
|                                       | H | -0.52218700 | 2.62487100  | -0.96101600 |
|                                       | O | 0.71451300  | 0.26709900  | -1.25245100 |
|                                       | O | -1.66754400 | -0.16936200 | -2.65493800 |
|                                       | O | 2.88876300  | -2.41072300 | -0.32738000 |
|                                       | O | 2.11820500  | -0.59872300 | 1.66083500  |
|                                       | O | 3.46791400  | -0.08037100 | -1.63613900 |
|                                       | O | -0.61371600 | 2.23755100  | 0.27700500  |
|                                       | O | 0.17103500  | -2.47280700 | -1.06551200 |
|                                       | O | -1.94223800 | 1.18883300  | 2.53624900  |
|                                       | O | 1.70742400  | 3.70861800  | 0.16050300  |
|                                       | O | -3.70376500 | 0.22727100  | 0.52423800  |
| TS[(H <sub>2</sub> O) <sub>13</sub> ] |   |             |             |             |

|   |             |             |             |
|---|-------------|-------------|-------------|
| O | -2.75806700 | 1.98172200  | -1.47910300 |
| O | -2.63267400 | -2.00304600 | -0.70182900 |
| O | 3.36264900  | 1.54059800  | 0.64797600  |
| H | 0.42464200  | 0.92098400  | -0.59464700 |
| H | 1.66134400  | 0.37874800  | -1.43027600 |
| H | -2.01329200 | -0.89069200 | -2.10232200 |
| H | -0.75559000 | -0.03654200 | -2.34759900 |
| H | 2.68102800  | -1.89402700 | 0.47076100  |
| H | 2.02249100  | -2.71023100 | -0.64119600 |
| H | 2.54896800  | 0.23822100  | 1.36140100  |
| H | 2.35573300  | -0.71491000 | 2.58486600  |
| H | 3.37279400  | -0.99758000 | -1.30316200 |
| H | 3.93842500  | -0.12268300 | -2.47173300 |
| H | -1.35413800 | 2.31536400  | -0.35118700 |
| H | -1.01625200 | 2.01144700  | 1.13172900  |
| H | -0.75990300 | -2.57094200 | -0.81956800 |
| H | 0.32315300  | -1.51438000 | -0.99122200 |
| H | -1.42929900 | 0.36653100  | 2.39580600  |
| H | -1.93765800 | 1.38368000  | 3.47614600  |
| H | 1.75374800  | 4.42559500  | 0.79736200  |
| H | 0.81553600  | 3.32566600  | 0.24790800  |
| H | -3.54432200 | 0.90219100  | -0.15455900 |
| H | -3.25678300 | 0.56178100  | 1.31577000  |
| H | -3.19086900 | 2.61949900  | -2.05137000 |
| H | -2.41627400 | 1.25270400  | -2.04655500 |
| H | -3.40013500 | -2.53934400 | -0.91658600 |
| H | -2.96181800 | -1.26595100 | -0.14598400 |
| H | 3.59038500  | 1.16652300  | -0.21627400 |
| H | 2.81827300  | 2.33175100  | 0.47563100  |
| H | 0.31649400  | -0.68691300 | 1.37073700  |
| O | -0.65836300 | -0.77151900 | 1.30646500  |
| N | -0.49303800 | -3.02844000 | 1.90317800  |
| H | -0.11019100 | -2.89228600 | 2.83507100  |
| H | -0.93695000 | -2.08968800 | 1.55872100  |
| H | 0.27863500  | -3.23658800 | 1.27272500  |

**Table S14** Calculated electronic energies, zero-point energies and free energies calculated by M06-2X/6-311+G(2d,2p), where ‘\*’ indicates the gas phase condition. Note that the liquid phase free energy refers to the solute free energy.

|                   | E(Hartree)  | ZPE(Hartree) | G(Hartree)  |
|-------------------|-------------|--------------|-------------|
| NH <sub>3</sub>   | -56.5545799 | 0.034533     | -56.5380719 |
| OH                | -75.7331858 | 0.008536     | -75.7415718 |
| H <sub>2</sub> O  | -76.4311385 | 0.021552     | -76.4278795 |
| NH <sub>3</sub> * | -56.5492533 | 0.034642     | -56.5326353 |

---

|                                       |              |          |              |
|---------------------------------------|--------------|----------|--------------|
| OH*                                   | -75.7283893  | 0.008636 | -75.7366723  |
| H <sub>2</sub> O*                     | -76.424065   | 0.021684 | -76.420013   |
| TS                                    | -132.2821155 | 0.042313 | -132.2648945 |
| TS*                                   | -132.2732869 | 0.042328 | -132.2557119 |
| TS(WM1)                               | -208.7208125 | 0.066846 | -208.6849075 |
| TS(WM2)                               | -208.7216075 | 0.068521 | -208.6828455 |
| TS(WM3)                               | -208.7194479 | 0.066283 | -208.6842149 |
| TS*(WM1)                              | -208.7117107 | 0.068842 | -208.6723447 |
| TS*(WM2)                              | -208.7117107 | 0.068838 | -208.6723557 |
| TS*(WM3)                              | -208.7048494 | 0.066157 | -208.6711774 |
| TS(WD1)                               | -285.1619712 | 0.091869 | -285.1054722 |
| TS(WD2)                               | -285.1588068 | 0.091357 | -285.1036368 |
| TS(WD3)                               | -285.1642257 | 0.094239 | -285.1037677 |
| TS*(WD1)                              | -285.1513618 | 0.093516 | -285.0909568 |
| TS*(WD2)                              | -285.1503315 | 0.093517 | -285.0897965 |
| TS*(WD3)                              | -285.1520698 | 0.09482  | -285.0911818 |
| TS(WT1)                               | -361.602119  | 0.117339 | -361.52491   |
| TS(WT2)                               | -361.6030589 | 0.118605 | -361.5233529 |
| TS(WT3)                               | -361.5987427 | 0.11765  | -361.5224007 |
| TS*(WT1)                              | -361.5961474 | 0.120155 | -361.5134084 |
| TS*(WT2)                              | -361.5899549 | 0.120335 | -361.5075769 |
| TS*(WT3)                              | -361.5895586 | 0.119912 | -361.5082176 |
| TS[(H <sub>2</sub> O) <sub>5</sub> ]  | -514.4859031 | 0.168301 | -514.3573993 |
| TS[(H <sub>2</sub> O) <sub>6</sub> ]  | -590.9361145 | 0.195521 | -590.7817334 |
| TS[(H <sub>2</sub> O) <sub>7</sub> ]  | -667.381713  | 0.220951 | -667.2048861 |
| TS[(H <sub>2</sub> O) <sub>8</sub> ]  | -743.822342  | 0.24727  | -743.620445  |
| TS[(H <sub>2</sub> O) <sub>10</sub> ] | -896.7108485 | 0.29622  | -896.4636538 |
| TS[(H <sub>2</sub> O) <sub>11</sub> ] | -973.1520175 | 0.321353 | -972.8830378 |
| TS[(H <sub>2</sub> O) <sub>13</sub> ] | -1126.042203 | 0.373276 | -1125.728756 |

---
